# Supplementary material for: Association between spectral characteristics of paraspinal muscles and functional disability in patients with low back pain: a cohort study
Source: PubMed Central journal article supplement — BMJ Open. 2018 Feb 14;8(2):e017091. doi: 10.1136/bmjopen-2017-017091 (PMC5829836; doi:10.1136/bmjopen-2017-017091), 2018-02-14
Supplement: bmjopen-2017-017091.draft_revisions.pdf [file bmjopen-2017-017091.draft_revisions.pdf]

# BMJ Open

BMJ Open is committed to open peer review. As part of this commitment we make the peer review history of every article we publish publicly available.

When an article is published we post the peer reviewers' comments and the authors' responses online. We also post the versions of the paper that were used during peer review. These are the versions that the peer review comments apply to.

The versions of the paper that follow are the versions that were submitted during the peer review process. They are not the versions of record or the final published versions. They should not be cited or distributed as the published version of this manuscript.

BMJ Open is an open access journal and the full, final, typeset and author-corrected version of record of the manuscript is available on our site with no access controls, subscription charges or pay-per-view fees (<http://bmjopen.bmj.com>).

If you have any questions on BMJ Open's open peer review process please email [editorial.bmjopen@bmj.com](mailto:editorial.bmjopen@bmj.com)

# BMJ Open

## Spectral characteristics of paraspinal muscles and functional disability in low back pain

|                                 |                                                                                                                                                                                                                                                                                                                                                                |
|---------------------------------|----------------------------------------------------------------------------------------------------------------------------------------------------------------------------------------------------------------------------------------------------------------------------------------------------------------------------------------------------------------|
| Journal:                        | <i>BMJ Open</i>                                                                                                                                                                                                                                                                                                                                                |
| Manuscript ID                   | bmjopen-2017-017091                                                                                                                                                                                                                                                                                                                                            |
| Article Type:                   | Research                                                                                                                                                                                                                                                                                                                                                       |
| Date Submitted by the Author:   | 30-Mar-2017                                                                                                                                                                                                                                                                                                                                                    |
| Complete List of Authors:       | Chiou, Shin-Yi; Imperial College London Department of Surgery and Cancer, Surgery and Cancer<br>Koutsos, Ermis; Imperial College London, Centre for Bio-Inspired Technology<br>Georgiou, Pantelis; Imperial College London, Centre for Bio-Inspired Technology<br>Strutton, Paul; Imperial College London Department of Surgery and Cancer, Surgery and Cancer |
| <b>Primary Subject Heading</b>: | Neurology                                                                                                                                                                                                                                                                                                                                                      |
| Secondary Subject Heading:      | Rehabilitation medicine                                                                                                                                                                                                                                                                                                                                        |
| Keywords:                       | trunk muscles, isometric, electromyography, wavelet transform, Back pain<br>< ORTHOPAEDIC & TRAUMA SURGERY                                                                                                                                                                                                                                                     |
|                                 |                                                                                                                                                                                                                                                                                                                                                                |

SCHOLARONE™  
Manuscripts

**Spectral characteristics of paraspinal muscles and functional disability in low back pain**

Shin-Yi Chiou, PhD<sup>1</sup>, Ermis Koutsos, PhD<sup>2</sup>, Pantelis Georgiou, PhD<sup>2</sup>, Paul H Strutton, PhD<sup>1,\*</sup>.

<sup>1</sup>The Nick Davey Laboratory, Human Performance Group, Division of Surgery, Department of Surgery and Cancer, Faculty of Medicine, Imperial College London, Charing Cross Hospital, London W6 8RF, UK.

<sup>2</sup>Department of Electrical and Electronic Engineering, Centre for Bio-inspired Technology, Imperial College London, London SW7 2AZ, UK.

\* Corresponding author Address: The Nick Davey Laboratory, Human Performance Group, Division of Surgery, Department of Surgery and Cancer, Faculty of Medicine, Imperial College London, W6 8RF.

Tel: +44 (0)20 331 38837; fax: +44 (0)20 331 38835. Email: [p.strutton@imperial.ac.uk](mailto:p.strutton@imperial.ac.uk)

1  
2  
3 **1 Abstract**  
4

5 **2 Objectives.** Characteristics of muscle activity, represented by surface electromyography (EMG), have  
6 revealed differences between patients with low back pain and healthy adults; how they relate to  
7  
8 functional and clinical parameters remains unclear. The purpose of the current study was to examine  
9  
10 the correlation between frequency characteristics of EMG (analysed using continuous wavelet  
11  
12 transform (CWT) analysis) and patients' self-rated score of disability.  
13  
14  
15  
16

17 **7 Design and setting.** This is a case control study with fifteen patients with mechanical low back pain  
18  
19 (LBP) without radicular symptoms. Patients were recruited from the orthopaedic clinic at Charing  
20  
21 Cross Hospital. Ten healthy adults were recruited from the staff working in the hospital and  
22  
23 associated university. Patients completed the Roland-Morris Disability Questionnaire (RMDQ) and  
24  
25 bilateral EMG activity was obtained from erector spinae at vertebral levels L4 and T12. Subjects  
26  
27 performed 3 brief maximal isometric voluntary contractions (MVCs) of the back extensors and the  
28  
29 torque was measured using a dynamometer. CWT was applied to the EMG signals of each muscle in  
30  
31 a 200ms window centred around the peak torque obtained during the MVCs. The ratio (low/high  
32  
33 frequencies) of the energy, the peak power, and the frequency of the peak power were calculated  
34  
35 for each recording site, averaged and correlated with the individual's RMDQ score.  
36  
37  
38

39 **17 Results.** Patients had lower peak power (T12 and L4) and lower frequency of the peak power (at T12)  
40  
41 than the healthy adults. Additionally, RMDQ positively correlated to the average ratio of energy at  
42  
43 T12 ( $\rho=0.63$ ;  $p=0.012$ ), i.e. greater self-rated disability corresponded to a dominant distribution of  
44  
45 energy in the lower frequencies.  
46  
47  
48

49 **21 Conclusion.** The current findings reveal alterations in EMG profile and its association with self-  
50  
51 related back pain disability, suggesting that spectral characteristics of EMG reflect muscle function.  
52  
53

54 **23 Keywords:** trunk muscles; isometric; electromyography; wavelet transform; back pain.  
55  
56  
57  
58  
59  
60

1  
2  
3 **1 Strengths and limitations of this study**  
4

- 5  
6 2 • This study uses a computational approach to decompose the signals of surface  
7  
8 3 electromyography obtained from paraspinal muscles in patients with low back pain with a view  
9  
10 4 to revealing information that may not be detected from a conventional amplitude analysis.  
11  
12 5 • The methodology of combining maximal voluntary isometric contraction of paraspinal muscles  
13  
14 6 and wavelet transform analysis offers the opportunity for a simple and quick assessment of  
15  
16 7 function of the back muscles.  
17  
18 8 • A difference in body mass between patients and controls indicates that careful interpretation of  
19  
20  
21 9 the findings are required.  
22  
23  
24  
25  
26  
27  
28  
29  
30  
31  
32  
33  
34  
35  
36  
37  
38  
39  
40  
41  
42  
43  
44  
45  
46  
47  
48  
49  
50  
51  
52  
53  
54  
55  
56  
57  
58  
59  
60

## Introduction

Low back pain (LBP) is a common health condition with 60-80% of people in the UK reporting it at some point in their lives<sup>1 2</sup>. The costs of back pain alone account for 20% of the total UK's health expenditure<sup>3</sup> and LBP is also an important cause of work absence. It has wide ranging impact upon both biological and psychosocial aspects such as physical impairments, mental health and loss of employment<sup>2 4</sup>. Evidence has shown that subjects with chronic low back pain (LBP) have changes in trunk muscle control by the central nervous system<sup>5 6</sup>, including reduced corticospinal excitability<sup>7</sup> and neural drive<sup>8</sup> in addition to anatomical changes such as in trunk muscle size and muscle fibre type which may account for observed altered activity patterns during functional tasks<sup>9 10</sup> and reductions in muscle strength and endurance<sup>11 12</sup>. Electromyographic (EMG) activity, including its temporal and spectral characteristics, has been commonly used to investigate muscle function. Changes in EMG signal amplitude are used as an indirect measure of overall muscle activity and of muscle contraction force<sup>13 14</sup>; however, the precise nature of the relationship between EMG amplitude and force output has not been established<sup>15 16</sup>. The frequency distribution of the EMG signals has been reported to be associated with the underlying muscle fibre type characteristics<sup>17 18</sup>. For example, fatigability of back muscles has shown to be related to the muscle fibre type area distribution in healthy subjects<sup>18</sup>. These observations indicate complex alterations in temporal (e.g. EMG signal amplitude) and spectral (e.g. median frequency) characteristics of muscle activity. Therefore, a simultaneous assessment of changes across these domains may provide more information on neuromuscular alterations of back muscles in patients with LBP.

Wavelet transform is a time-frequency method of signal analysis, which has been proposed to be more suitable for analysis of surface EMG since these are non-stationary<sup>19</sup> spikey<sup>20</sup> signals than short-time Fourier transform (STFT). Wavelet transform projects a signal into space comprised of functions limited in duration. This technique consists of mapping the signal in frequency and time from a series of base functions, which produces a family of ordered decompositions located in

1  
2  
3 different frequency bands. From a single basic wavelet, a so-called mother wavelet, stretching and  
4  
5 shifting (dilating and translating) the wavelet allows for discovery of the frequency content and  
6  
7 location in time of the signal <sup>21</sup>.

8  
9 Studies have shown associations between wavelet transform and muscle function. In healthy adults,  
10  
11 changes in EMG spectral power and frequency have been observed in limb and trunk muscles during  
12  
13 fatiguing exercise <sup>22 23</sup>. Previous work has demonstrated that energy distribution between low and  
14  
15 high frequency bands from leg muscles was different in individuals with diabetic neuropathy and in  
16  
17 postoperative total knee arthroplasty patients compared to controls <sup>24-26</sup>. This may be due to  
18  
19 changes in motor unit recruitment or muscle fibre type distribution in patients <sup>27 28</sup>. In patients with  
20  
21 LBP, the total power in the trunk muscles was lower and could be used to discriminate patients from  
22  
23 controls <sup>29</sup>. However, whether there are changes in energy distribution between low and high  
24  
25 frequency bands from trunk muscles and whether these changes correlate with any clinical or  
26  
27 functional scores (i.e. pain, disability) remains unclear.  
28  
29

30  
31 The purpose of the current study was to investigate whether time and frequency domain EMG  
32  
33 characteristics, obtained using continuous wavelet transform (CWT), of erector spinae muscles (ES)  
34  
35 in people with LBP are associated with levels of back pain disability and pain. We hypothesised that  
36  
37 the EMG characteristics would be different between people with LBP and controls and that the  
38  
39 energy distribution between low and high frequency bands would be associated with the level of  
40  
41 disability and/or pain.  
42

#### 43 **Materials and Methods**

##### 44 *Participants.*

45  
46  
47 With ethical approval (from NHS NRES Committee London – Harrow) and written informed consent,  
48  
49 15 patients with mechanical, non-specific low back pain (LBP group) were recruited from the  
50  
51 orthopaedic clinic at Charing Cross Hospital and 10 healthy controls were recruited from the staff  
52  
53 working in the hospital and associated university. Only subjects with mechanical LBP without  
54  
55  
56  
57  
58  
59  
60

1  
2  
3 radicular symptoms were included; those with back pain related to rheumatologic disease,  
4  
5 spondylolisthesis or spinal trauma or with constant severe pain were excluded. All of the subjects  
6  
7 were asked to complete the Edinburgh Handedness Inventory, a 10-item questionnaire with a score  
8  
9 between -100 (left handed) and 100 (right handed)<sup>30</sup> and a visual analogue pain scale (VAS; 0 - no  
10  
11 pain to 10 - maximum pain); patients additionally completed a 24-item Roland-Morris Disability  
12  
13 Questionnaire (RMDQ), a disease specific functional measure<sup>31</sup>; the scores range from 0, no  
14  
15 disability to 24, maximum disability.  
16

#### 17 18 19 *Recordings.*

20  
21 **Torque.** Back extensor isometric torque was measured using a Cybex Norm Isokinetic Testing System  
22  
23 (CSM Inc., Stoughton, MA, USA) with an extendable input lever arm. The output from the Cybex was  
24  
25 sampled at 500Hz by a data acquisition system [Power 1401 plus and Spike2 v5; Cambridge  
26  
27 Electronic Design (CED), Cambridge, UK] connected to a personal laptop for subsequent offline  
28  
29 analysis. **Electromyography (EMG).** Bilateral EMG recordings were obtained from the erector spinae  
30  
31 (ES) muscles at vertebral levels T12 and L4. Pairs of Ag/AgCl electrodes (self-adhesive, 2cm diameter,  
32  
33 CareFusion, UK) were positioned 3cm either side of the spinous processes, parallel to the fibre  
34  
35 orientation of ES muscles, with an inter-electrode distance of 2cm. A ground electrode was placed  
36  
37 over the left anterior superior iliac spine. The EMG signals were filtered (10Hz–1kHz), and amplified  
38  
39 (1000×; Iso-DAM, World Precision Instruments, UK) before being sampled at 4kHz by the data  
40  
41 acquisition system; both torque and EMG data were collected simultaneously.  
42  
43  
44

#### 45 46 47 *Experimental procedure.*

48  
49 The experimental setup has been used previously<sup>8 32</sup>. Briefly, subjects were positioned prone on the  
50  
51 dynamometer bench, with their ankles and hips strapped securely, to help isolate back muscle  
52  
53 movements as well as limit the contributions of hip extensors; the arms were by the sides and the  
54  
55 iliac crests were aligned with the pivot of the dynamometer lever arm. The lever arm was positioned  
56  
57 over the lower edge of the scapulae (see Fig. 1); this was confirmed by a physiotherapist (SYC) who  
58  
59  
60



1  
2  
3 identified the inferior angle of the scapula for each subject by palpation. Subjects had a gentle  
4  
5 warm-up consisting of several push-ups into extension without using their arms. Following this,  
6  
7 three brief (~3s) maximal voluntary isometric contractions (MVICs) of the trunk extensors were  
8  
9 performed with at least 10 seconds interval between each contraction; consistent verbal  
10  
11 encouragement was given throughout. After each contraction, subjects were asked to indicate how  
12  
13 much effort they used on a modified Borg scale (from 0, no effort to 10, maximal effort)<sup>33</sup>.  
14  
15

#### 16 *Data analysis.*

17  
18  
19 The peak torque achieved during the 3 MVICs was identified and the EMG signals obtained during  
20  
21 the MIVC from each back muscle in a 200ms window centred on the peak torque were calculated as  
22  
23 root-mean-square amplitude (rmsEMG). They were then resolved into their respective intensities in  
24  
25 time-frequency space using a continuous wavelet transform (CWT), processed in MATLAB R2014a  
26  
27 (MathWorks, Natick, Massachusetts). Specifically, the Daubechies family of wavelet (in particular the  
28  
29 db4 wavelet) was selected for CWT decomposition due to the similarity between the wavelet and  
30  
31 the waveforms of motor unit action potentials<sup>34 35</sup>. Performing a CWT on a time waveform results in  
32  
33 a matrix of normalized coefficients calculated over scale and time. Scales were tested from 5 to 300  
34  
35 (corresponding to 595.29Hz-9.92Hz) with regards to the common signal bandwidth of surface EMG<sup>36</sup>  
36  
37<sup>37</sup>; the sum of the energy of the wavelet coefficient for the 200ms window was obtained for each  
38  
39 scale (Fig 1). Parameters including peak power and its corresponding frequency were obtained.  
40  
41 Furthermore, since the ratio of muscle fibre type I to type II in the ES has been reported to be  
42  
43 approximately 1.8<sup>38</sup>, the scale splitting the energy matrix into the ratio 1.8 of lower to higher energy  
44  
45 (low:high frequencies) for each muscle was identified from the controls. The scale was then  
46  
47 converted into its corresponding frequency; this corresponding frequency was used to split the  
48  
49 energy matrix obtained from the LBP group into two parts representing lower to higher energy. The  
50  
51 ratio of these two parts from the energy matrix was then calculated for each muscle for individuals  
52  
53  
54  
55  
56 in the LBP group.  
57  
58  
59  
60

### *Statistical analysis.*

Data were analysed using Statistical Program for the Social Sciences (SPSS) version 22 (IBM Corp, Armonk, NY). Demographic data and modified Borg scale scores were compared between the control group and the LBP group using independent-t tests and Chi-Square tests for scale data and for nominal data (gender), respectively. Normal distribution was tested by the Shapiro-Wilk test for spectral parameters and rmsEMG; since the variables of frequency at the peak power and the ratio were not normally distributed ( $p < 0.05$ ) and our sample sizes of two groups were not equal, non-parametric tests were applied. Wilcoxon Signed Rank tests and Mann-Whitney  $U$  tests were used to examine within-group and between-group differences, respectively. Within-group comparisons were made between left and right sides for rmsEMG at T12 and L4; between-group comparisons were made between rmsEMG, peak power and its corresponding frequency and the ratio of energy. Given that this ratio was based on the presumed ratio of muscle fibre type I to type II in the ES<sup>38</sup>, Spearman correlation coefficients were performed between the scores of questionnaires (RMDQ and VAS) and the ratio of energy in the LBP group. Statistical significance was set at  $p < 0.05$  and Bonferroni correction was applied to allow for multiple comparisons.

## **Results**

### *Group characteristics.*

Demographic data of the groups are shown in Table 1. The median (interquartile range) duration of back pain episode was 20 (22) months in patients with LBP. Of 15 patients with LBP, 6 had pain on the right side and 9 had bilateral pain. The MVIC torque (normalized to body mass) of patients was smaller than that of controls (mean $\pm$ SD: LBP: 2.88 $\pm$ 1.03 Nm/kg; C: 4.11 $\pm$ 1.42Nm/kg;  $Z = -2.16$ ;  $p = 0.03$ ). Further, the VAS reported by patients was 5.2 $\pm$ 2.84; as anticipated, controls reported no pain (i.e. 0.0). All subjects completed all aspects of the protocol; no data were excluded from analyses. During the MVICs, the modified Borg scale scores reported by the subjects were not different between the groups (LBP: 8.80 $\pm$ 1.04; C: 9.42 $\pm$ 0.60;  $p = 0.07$ ).

1  
2  
3 *Root-mean-square (RMS) EMG.*  
4

5  
6 There was no side difference in rms EMG in the LBP group (T12:  $Z=-1.36$ ;  $p=0.18$ ; L4:  $Z=-1.07$ ;  $p=0.29$ )  
7  
8 or in the controls (T12:  $Z=-0.30$ ;  $p=0.77$ ; L4:  $Z=-0.15$ ;  $p=0.88$ ; Table 2). The mean rmsEMG, averaged  
9  
10 from left and right ES, at T12 and L4 vertebral levels was significantly lower in the LBP group than in  
11  
12 the controls (T12:  $Z=-2.69$ ;  $p=0.007$ ; L4:  $Z=-2.33$ ;  $p=0.02$ ; Table 2).  
13

14  
15 *Spectral parameters.*  
16

17  
18 The peak power (Fig 2A) and its corresponding frequency (Fig 2B) of the transformed EMG were  
19  
20 different between the two groups. For the ES T12, the peak power and its corresponding frequency  
21  
22 were lower in the LBP group (peak power:  $0.84\pm 0.22$ ; frequency:  $40.94\pm 8.21\text{Hz}$ ) than in the controls  
23  
24 (peak power:  $1.17\pm 0.25$ ; frequency:  $49.56\pm 10.56\text{Hz}$ ; peak power:  $Z=-2.88$ ;  $p=0.004$ ; frequency:  $Z=-$   
25  
26  $2.16$ ;  $p=0.030$ ; Fig 2). For the ES L4, the peak power was lower in the LBP group (peak power:  
27  
28  $0.75\pm 0.18$ ) than in the controls (peak power:  $1.13\pm 0.29$ ;  $Z=-2.99$ ;  $p=0.003$ ; Fig 2A), whereas its  
29  
30 corresponding frequency (LBP group:  $40.64\pm 14.81\text{Hz}$ ; control group:  $47.97\pm 6.16\text{Hz}$ ) was not different  
31  
32 between two groups ( $Z=-1.66$ ;  $p=0.096$ ; Fig 2B).  
33

34  
35  
36 In the controls, the mean ( $\pm$ SD) scales splitting the energy matrix into the ratio to  $\sim 1.8$  of low to high  
37  
38 energy for T12 (the mean ratio was  $1.72\pm 0.05$ ) and L4 ( $1.74\pm 0.04$ ) were  $36.8\pm 10.52$  and  $34.25\pm 9.60$ ,  
39  
40 respectively; the corresponding frequencies were 87Hz for T12 and 96Hz for L4. The splitting scales  
41  
42 used in the LBP group were therefore 37 for T12 and 34 for L4; the mean ratios (low/high) at these  
43  
44 two scales were  $3.56\pm 2.36$  for T12 ( $Z=-2.11$ ;  $p=0.035$ , compared to the control group) and  $4.32\pm 3.19$   
45  
46 for L4 ( $Z=-1.94$ ;  $p=0.052$ ) scales in the LBP group. Spearman correlation analysis showed a  
47  
48 correlation between the ratios from ES T12 and the RMDQ scores ( $\rho=0.63$ ;  $p=0.012$ ; Fig 3);  
49  
50 however, the ratios from ES L4 did not significantly correlate with the RMDQ scores ( $\rho=0.47$ ;  
51  
52  $p=0.075$ ). The ratios did not correlate with the VAS scores (ES T12:  $\rho=0.09$ ;  $p=0.76$ . ES L4:  
53  
54  $\rho=0.01$ ;  $p=0.96$   $p>0.05$ ).  
55  
56  
57  
58  
59  
60

## Discussion

The current study used continuous wavelet transform to decompose the surface EMG signals recorded from the ES during maximal isometric back extensions performed by patients with LBP and controls. In patients with LBP, there was a lower peak power in ES T12 and L4 and the overall energy distribution in ES T12 was shifted toward lower frequencies than in the controls. Moreover, the ratios of energy between low and high frequencies, calculated from ES T12, correlated with patients' self-rated back pain disability which may highlight the potential clinical application of wavelet analysis in monitoring the progression of, or response to treatment, for back pain.

Frequency analysis has been widely applied to analyse EMG signals recorded from paraspinal muscles in patients with chronic LBP and short-time Fourier transform (STFT) has been used in the majority of studies. Mean and median frequencies were lower in patients with chronic LBP than in controls<sup>29 39</sup>; however, controversial results are still reported<sup>40 41</sup>. Although there is evidence that analysis of back muscle EMG activity using STFT and wavelet transform provides similar information<sup>23 42 43</sup>, some studies suggest that wavelet transform could detect changes in muscle fatigue earlier and be more sensitive than the STFT<sup>44-46</sup>. A recent study used discrete wavelet transform on surface EMG of trunk muscles during the contraction in subjects with chronic LBP and in controls. Patients with chronic LBP had lower spectral power in the trunk muscles compared to the healthy subjects<sup>29</sup>; however, their study did not include any subjective measurements (e.g. pain scores, disability scores) or compare energy distribution between low and high frequency bands, which may reflect alterations in motor unit recruitment or muscle fibre type distributions. Our results show patients with LBP presented different EMG characteristics from healthy subjects, including lower peak power (both ES T12 and L4) and its corresponding frequency (ES T12), and higher ratio of energy between low and high frequencies (ES T12), in line with previous findings that patients with chronic LBP have an overall shift of energy distribution toward lower frequencies in the back muscles<sup>47</sup>. We further demonstrate a correlation between the energy distribution calculated from the EST12 and the

1  
2  
3 RMDQ, indicating an association between muscle function and self-rated disability. However, the  
4  
5 reduced volume muscle at the lumbar level <sup>38</sup> might explain the differences in the findings between  
6  
7 ES T12 and L4 levels. Together with previous work showing that EMG variables recorded from ES  
8  
9 may identify people at increased risk of developing low back pain in two years <sup>48</sup>, we suggest that  
10  
11 the EMG characteristics could be useful in clinics to monitor progression of back pain as well as the  
12  
13 effectiveness of therapeutic interventions.  
14

15  
16 Changes in spectral energy from leg and thigh muscles have been found in individuals with diabetic  
17  
18 neuropathy and are suggested to be related to alterations in muscle recruitment strategies due to  
19  
20 the loss of type I fibres in this population <sup>25</sup>. Studies have shown that instantaneous spectra derived  
21  
22 from wavelet decomposition of EMG signals are associated with activity from different muscle fibre  
23  
24 types using a range of approaches including electrical nerve stimulation <sup>28</sup> and voluntary  
25  
26 contractions <sup>49</sup>. In addition, previous findings using conventional Fourier transformation  
27  
28 demonstrated a correlation between the change in median frequency in ES during fatiguing exercise  
29  
30 and the relative area of the muscle occupied by type I fibres in healthy subjects <sup>18</sup>. Anatomical  
31  
32 evidence from biopsy studies is equivocal, with some studies demonstrating differences in muscle  
33  
34 fibre-type proportions in paraspinal muscles between patients with LBP and healthy subjects <sup>50 51</sup>,  
35  
36 whilst others show no differences <sup>52 53</sup>. Nevertheless, studies using twitch interpolation to assess  
37  
38 central neural drive to muscles suggest that decreases in time-to-peak amplitude of superimposed  
39  
40 twitches at increasing levels of voluntary contraction reflect the recruitment of different types of  
41  
42 motor units <sup>32 54-56</sup>. Further, given patients with chronic CLBP patients have been shown to exhibit  
43  
44 longer time-to-peak amplitudes of twitches during MVICs, this supports the view that these patients  
45  
46 have alterations in muscle fibre-type composition <sup>8</sup>. In the current study, the spectra obtained from  
47  
48 the patients with LBP had a shift in the peak power towards the lower frequencies; this might reflect  
49  
50 alterations in motor control or in muscle fibre-type proportions.  
51  
52  
53  
54  
55  
56  
57  
58  
59  
60

1  
2  
3 The approach used in the current study may provide a valuable tool for clinical assessment. Surface  
4  
5 EMG recordings are easy to use in clinics and the task is feasible for people with chronic LBP as all of  
6  
7 our patients were able to perform the 3 maximal isometric back extensions. While factors such as  
8  
9 fear avoidance or pain inhibition likely affect muscle activity, our subjects were asked to report pain  
10  
11 levels during the MVICs and also to give an indication (on a modified Borg scale) of the degree of  
12  
13 effort used to perform the MVICs. Patients reported no increase in pain, and levels of effort  
14  
15 comparable to the controls. Wavelet transform is a robust approach for the surface EMG signal and  
16  
17 could reveal extra features which may be useful to monitor subtle changes in muscle function during  
18  
19 rehabilitation. A further study to test whether the wavelet approach is able to detect the therapeutic  
20  
21 effect on muscle function is therefore warranted.  
22  
23

24  
25 In conclusion, the patients with LBP recruited in the current study had lower maximal force of the  
26  
27 back extensors and smaller ES muscle activity during the MVICs. The wavelet transform further  
28  
29 revealed alterations in EMG profile and its association with the self-related back pain disability,  
30  
31 indicating that spectral characteristics of EMG reflect muscle function.  
32  
33

#### 34 **Acknowledgments**

35  
36  
37 We would like to thank all participants of this study.  
38  
39  
40  
41  
42

43 **Funding statement:** There was no funding or other form of support for this project.  
44  
45

46 **Competing interests:** None declared.  
47

48 **Author's contributions:** SYC and PHS conceived and designed the study. SYC and PHS conducted the  
49  
50 experiment. SYC, EK and PHS analysed the data and interpreted the data. PG provided guidance on  
51  
52 the data analysis. All authors drafted the manuscript and read, edited and approved the final version  
53  
54 of the manuscript. All authors had full access to all of the data in the study and can take  
55  
56 responsibility for the integrity of the data and the accuracy of the data analysis.  
57  
58  
59  
60

**Data sharing statement:** No additional data are available.

## References

1. Macfarlane GJ, Thomas E, Croft PR, et al. Predictors of early improvement in low back pain amongst consulters to general practice: the influence of pre-morbid and episode-related factors. *Pain* 1999;80(1-2):113-9.
2. Dunn KM, Croft PR. Epidemiology and natural history of low back pain. *Eura Medicophys* 2004;40(1):9-13.
3. Maniadakis N, Gray A. The economic burden of back pain in the UK. *Pain* 2000;84(1):95-103.
4. Chou R, Qaseem A, Snow V, et al. Diagnosis and treatment of low back pain: a joint clinical practice guideline from the American College of Physicians and the American Pain Society. *Ann Intern Med* 2007;147(7):478-91.
5. Hodges PW, Moseley GL, Gabrielsson A, et al. Experimental muscle pain changes feedforward postural responses of the trunk muscles. *Exp Brain Res* 2003;151(2):262-71. doi: 10.1007/s00221-003-1457-x
6. Strutton PH, Theodorou S, Catley M, et al. Corticospinal excitability in patients with chronic low back pain. *J Spinal Disord Tech* 2005;18(5):420-4.
7. Tsao H, Danneels LA, Hodges PW. Smudging the motor brain in young adults with recurrent low back pain. *Spine (Phila Pa 1976)* 2011;36(21):1721-7. doi: 10.1097/BRS.0b013e31821c4267 [published Online First: 2011/04/22]
8. Chiou SY, Shih YF, Chou LW, et al. Impaired neural drive in patients with low back pain. *European journal of pain* 2014;18(6):794-802.
9. Dubois JD, Piche M, Cantin V, et al. Effect of experimental low back pain on neuromuscular control of the trunk in healthy volunteers and patients with chronic low back pain. *Journal of electromyography and kinesiology : official journal of the International Society of Electrophysiological Kinesiology* 2011;21(5):774-81. doi: 10.1016/j.jelekin.2011.05.004
10. D'Hooge R, Hodges P, Tsao H, et al. Altered trunk muscle coordination during rapid trunk flexion in people in remission of recurrent low back pain. *Journal of electromyography and kinesiology : official journal of the International Society of Electrophysiological Kinesiology* 2013;23(1):173-81. doi: 10.1016/j.jelekin.2012.09.003
11. Nicolaisen T, Jorgensen K. Trunk strength, back muscle endurance and low-back trouble. *Scand J Rehabil Med* 1985;17(3):121-7.
12. Roy SH, De Luca CJ, Casavant DA. Lumbar muscle fatigue and chronic lower back pain. *Spine (Phila Pa 1976)* 1989;14(9):992-1001.
13. Pitcher MJ, Behm DG, MacKinnon SN. Reliability of electromyographic and force measures during prone isometric back extension in subjects with and without low back pain. *Applied physiology, nutrition, and metabolism = Physiologie appliquee, nutrition et metabolisme* 2008;33(1):52-60. doi: 10.1139/H07-132
14. Hubley-Kozey CL, Vezina MJ. Differentiating temporal electromyographic waveforms between those with chronic low back pain and healthy controls. *Clin Biomech (Bristol, Avon)* 2002;17(9-10):621-9.
15. Huebner A, Faenger B, Scholle HC, et al. Re-evaluation of the amplitude-force relationship of trunk muscles. *Journal of biomechanics* 2015;48(6):1198-205. doi: 10.1016/j.jbiomech.2015.02.016
16. Kumar S, Narayan Y. Torque and EMG in isometric graded flexion-rotation and extension-rotation. *Ergonomics* 2001;44(8):795-813. doi: 10.1080/00140130110045802

17. Gerdle B, Karlsson S, Crenshaw AG, et al. The influences of muscle fibre proportions and areas upon EMG during maximal dynamic knee extensions. *European journal of applied physiology* 2000;81(1-2):2-10. doi: 10.1007/PL00013792
18. Mannion AF, Dumas GA, Stevenson JM, et al. The influence of muscle fiber size and type distribution on electromyographic measures of back muscle fatigability. *Spine (Phila Pa 1976)* 1998;23(5):576-84.
19. Karlsson S, Yu J, Akay M. Time-frequency analysis of myoelectric signals during dynamic contractions: a comparative study. *IEEE Trans Biomed Eng* 2000;47(2):228-38. doi: 10.1109/10.821766
20. Karlsson S, Yu J, Akay M. Enhancement of spectral analysis of myoelectric signals during static contractions using wavelet methods. *IEEE Trans Biomed Eng* 1999;46(6):670-84.
21. von Tscharner V. Intensity analysis in time-frequency space of surface myoelectric signals by wavelets of specified resolution. *Journal of electromyography and kinesiology : official journal of the International Society of Electrophysiological Kinesiology* 2000;10(6):433-45.
22. Chowdhury SK, Nimbarte AD, Jaridi M, et al. Discrete wavelet transform analysis of surface electromyography for the fatigue assessment of neck and shoulder muscles. *Journal of electromyography and kinesiology : official journal of the International Society of Electrophysiological Kinesiology* 2013;23(5):995-1003. doi: 10.1016/j.jelekin.2013.05.001
23. Coorevits P, Danneels L, Cambier D, et al. Test-retest reliability of wavelet - and Fourier based EMG (instantaneous) median frequencies in the evaluation of back and hip muscle fatigue during isometric back extensions. *Journal of electromyography and kinesiology : official journal of the International Society of Electrophysiological Kinesiology* 2008;18(5):798-806. doi: 10.1016/j.jelekin.2007.01.007
24. Weiderpass HA, Pachi CG, Yamamoto JF, et al. Time-frequency analysis methods for detecting effects of diabetic neuropathy. *Int J Numer Method Biomed Eng* 2013;29(9):1000-10. doi: 10.1002/cnm.2545
25. Sacco IC, Hamamoto AN, Onodera AN, et al. Motor strategy patterns study of diabetic neuropathic individuals while walking. A wavelet approach. *Journal of biomechanics* 2014;47(10):2475-82. doi: 10.1016/j.jbiomech.2014.04.007
26. Kuntze G, von Tscharner V, Hutchison C, et al. Alterations in lower limb multimuscle activation patterns during stair climbing in female total knee arthroplasty patients. *J Neurophysiol* 2015;114(5):2718-25. doi: 10.1152/jn.00370.2015
27. Solomonow M, Baten C, Smit J, et al. Electromyogram power spectra frequencies associated with motor unit recruitment strategies. *J Appl Physiol (1985)* 1990;68(3):1177-85.
28. Wakeling JM, Syme DA. Wave properties of action potentials from fast and slow motor units of rats. *Muscle & nerve* 2002;26(5):659-68. doi: 10.1002/mus.10263
29. Kumar S, Prasad N. Torso muscle EMG profile differences between patients of back pain and control. *Clin Biomech (Bristol, Avon)* 2010;25(2):103-9. doi: 10.1016/j.clinbiomech.2009.10.013
30. Oldfield RC. The assessment and analysis of handedness: the Edinburgh inventory. *Neuropsychologia* 1971;9(1):97-113.
31. Roland M, Fairbank J. The Roland-Morris Disability Questionnaire and the Oswestry Disability Questionnaire. *Spine (Phila Pa 1976)* 2000;25(24):3115-24.
32. Chiou SY, Jeevathol A, Odedra A, et al. Voluntary activation of trunk extensors appears normal in young adults who have recovered from low back pain. *Eur J Pain* 2015;19(10):1506-15. doi: 10.1002/ejp.684
33. Borg GA. Psychophysical bases of perceived exertion. *Medicine and science in sports and exercise* 1982;14(5):377-81.
34. Beck TW, Housh TJ, Johnson GO, et al. Comparison of the fast Fourier transform and continuous wavelet transform for examining mechanomyographic frequency versus eccentric torque relationships. *J Neurosci Methods* 2006;150(1):59-66. doi: 10.1016/j.jneumeth.2005.06.003



- 1  
2  
3 35. Croce R, Miller J, Chamberlin K, et al. Wavelet analysis of quadriceps power spectra and  
4 amplitude under varying levels of contraction intensity and velocity. *Muscle & nerve*  
5 2014;50(5):844-53. doi: 10.1002/mus.24230  
6  
7 36. van Boxtel A. Optimal signal bandwidth for the recording of surface EMG activity of facial, jaw,  
8 oral, and neck muscles. *Psychophysiology* 2001;38(1):22-34.  
9  
10 37. Rosenburg R, Seidel H. Electromyography of lumbar erector spinae muscles--influence of  
11 posture, interelectrode distance, strength, and fatigue. *Eur J Appl Physiol Occup Physiol*  
12 1989;59(1-2):104-14.  
13  
14 38. Mannion AF, Dumas GA, Cooper RG, et al. Muscle fibre size and type distribution in thoracic and  
15 lumbar regions of erector spinae in healthy subjects without low back pain: normal values  
16 and sex differences. *J Anat* 1997;190 ( Pt 4):505-13.  
17  
18 39. Linsinski P. Surface EMG in chronic low back pain. *European spine journal : official publication of*  
19 *the European Spine Society, the European Spinal Deformity Society, and the European Section*  
20 *of the Cervical Spine Research Society* 2000;9(6):559-62.  
21  
22 40. Kramer M, Ebert V, Kinzl L, et al. Surface electromyography of the paravertebral muscles in  
23 patients with chronic low back pain. *Archives of physical medicine and rehabilitation*  
24 2005;86(1):31-6.  
25  
26 41. Humphrey AR, Nargol AV, Jones AP, et al. The value of electromyography of the lumbar  
27 paraspinal muscles in discriminating between chronic-low-back-pain sufferers and normal  
28 subjects. *European spine journal : official publication of the European Spine Society, the*  
29 *European Spinal Deformity Society, and the European Section of the Cervical Spine Research*  
30 *Society* 2005;14(2):175-84. doi: 10.1007/s00586-004-0792-3  
31  
32 42. da Silva RA, Lariviere C, Arsenault AB, et al. The comparison of wavelet- and Fourier-based  
33 electromyographic indices of back muscle fatigue during dynamic contractions: validity and  
34 reliability results. *Electromyography and clinical neurophysiology* 2008;48(3-4):147-62.  
35  
36 43. Coorevits P, Danneels L, Cambier D, et al. Correlations between short-time Fourier- and  
37 continuous wavelet transforms in the analysis of localized back and hip muscle fatigue  
38 during isometric contractions. *Journal of electromyography and kinesiology : official journal*  
39 *of the International Society of Electrophysiological Kinesiology* 2008;18(4):637-44. doi:  
40 10.1016/j.jelekin.2007.01.006  
41  
42 44. Chowdhury SK, Nimbarte AD. Comparison of Fourier and wavelet analysis for fatigue assessment  
43 during repetitive dynamic exertion. *Journal of electromyography and kinesiology : official*  
44 *journal of the International Society of Electrophysiological Kinesiology* 2015;25(2):205-13.  
45 doi: 10.1016/j.jelekin.2014.11.005  
46  
47 45. Pope MH, Aleksiev A, Panagiotacopoulos ND, et al. Evaluation of low back muscle surface EMG  
48 signals using wavelets. *Clin Biomech (Bristol, Avon)* 2000;15(8):567-73.  
49  
50 46. Penailillo L, Silvestre R, Nosaka K. Changes in surface EMG assessed by discrete wavelet  
51 transform during maximal isometric voluntary contractions following supramaximal cycling.  
52 *Eur J Appl Physiol* 2013;113(4):895-904. doi: 10.1007/s00421-012-2499-1  
53  
54 47. Sparto PJ, Parnianpour M, Barria EA, et al. Wavelet analysis of electromyography for back muscle  
55 fatigue detection during isokinetic constant-torque exertions. *Spine (Phila Pa 1976)*  
56 1999;24(17):1791-8.  
57  
58 48. Heydari A, Nargol AV, Jones AP, et al. EMG analysis of lumbar paraspinal muscles as a predictor  
59 of the risk of low-back pain. *European spine journal : official publication of the European*  
60 *Spine Society, the European Spinal Deformity Society, and the European Section of the*  
*Cervical Spine Research Society* 2010;19(7):1145-52. doi: 10.1007/s00586-010-1277-1  
49. Wakeling JM, Rozitis AI. Spectral properties of myoelectric signals from different motor units in  
the leg extensor muscles. *J Exp Biol* 2004;207(Pt 14):2519-28. doi: 10.1242/jeb.01042  
50. Bajek S, Bobinac D, Bajek G, et al. Muscle fiber type distribution in multifidus muscle in cases of  
lumbar disc herniation. *Acta medica Okayama* 2000;54(6):235-41.

- 1  
2  
3 51. Mannion AF, Weber BR, Dvorak J, et al. Fibre type characteristics of the lumbar paraspinal  
4 muscles in normal healthy subjects and in patients with low back pain. *Journal of*  
5 *orthopaedic research : official publication of the Orthopaedic Research Society*  
6 1997;15(6):881-87. doi: 10.1002/jor.1100150614  
7  
8 52. Mattila M, Hurme M, Alaranta H, et al. The multifidus muscle in patients with lumbar disc  
9 herniation. A histochemical and morphometric analysis of intraoperative biopsies. *Spine*  
10 *(Phila Pa 1976)* 1986;11(7):732-8.  
11  
12 53. Crossman K, Mahon M, Watson PJ, et al. Chronic low back pain-associated paraspinal muscle  
13 dysfunction is not the result of a constitutionally determined "adverse" fiber-type  
14 composition. *Spine (Phila Pa 1976)* 2004;29(6):628-34.  
15  
16 54. Milner-Brown HS, Stein RB, Yemm R. The orderly recruitment of human motor units during  
17 voluntary isometric contractions. *J Physiol* 1973;230(2):359-70.  
18  
19 55. Henneman E, Somjen G, Carpenter DO. Excitability and inhibitability of motoneurons of different  
20 sizes. *J Neurophysiol* 1965;28(3):599-620.  
21  
22 56. Bottle E, Strutton PH. Relationship between back muscle endurance and voluntary activation.  
23 *Journal of electromyography and kinesiology : official journal of the International Society of*  
24 *Electrophysiological Kinesiology* 2012;22(3):383-90. doi: 10.1016/j.jelekin.2012.02.006;  
25 10.1016/j.jelekin.2012.02.006  
26  
27  
28  
29  
30  
31  
32  
33  
34  
35  
36  
37  
38  
39  
40  
41  
42  
43  
44  
45  
46  
47  
48  
49  
50  
51  
52  
53  
54  
55  
56  
57  
58  
59  
60

1  
2  
3 **1 Figure Captions**  
4

5  
6 **2 Figure 1.** Experimental setup (top left) and peak torque and EMG activity recorded from left and  
7  
8 right erector spinae at T12 (L ES and R ES) from a representative subject during one maximal  
9  
10 voluntary isometric contraction (MVIC, top right). A representative 3 dimensional matrix of power,  
11  
12 scale (frequency) and time calculated from a continuous wavelet transform analysis of the EMG data  
13  
14 centred around the peak torque (bottom right). The bottom left figure represents the sum of the  
15  
16 power collapsed across the time-window. The area under the curve has been split according to the  
17  
18 ratio 1.8 (see data analysis) and the corresponding scale was used to split the curve derived from  
19  
20 each patient dataset.  
21  
22

23  
24 **10 Figure 2.** Group mean ( $\pm$ SEM) data showing (A) peak power and (B) its corresponding frequency  
25  
26 from erector spinae muscles at vertebral levels T12 (ES T12) and L4 (ES L4) in the controls and in  
27  
28 patients with LBP. \* $p < 0.05$ , between-group comparison.  
29  
30

31  
32 **13 Figure 3.** Correlation between the ratio of energy at low to high (low:high) frequencies and Roland-  
33  
34 Morris Disability Questionnaire (RMDQ) in subjects with LBP.  
35  
36  
37  
38  
39  
40  
41  
42  
43  
44  
45  
46  
47  
48  
49  
50  
51  
52  
53  
54  
55  
56  
57  
58  
59  
60

Table 1. Demographic data.

| Characteristics                               | Controls (n = 10) | LBP (n = 15)   | P value |
|-----------------------------------------------|-------------------|----------------|---------|
| Age (years)                                   | 44.6 ± 7.9        | 43.5 ± 6.3     | 0.72    |
| Gender                                        | 5Male; 5Female    | 6Male; 9Female | 0.70    |
| Body stature (m)                              | 1.70 ± 0.09       | 1.70 ± 0.07    | 0.95    |
| Body mass (kg)                                | 72.37 ± 10.32     | 87.67 ± 24.39  | 0.04    |
| Edinburgh Handedness Inventory                | 64.44 ± 54.34     | 79.00 ± 33.21  | 0.51    |
| Roland-Morris Disability Questionnaire (0-24) | 0.0 ± 0.0         | 10.27 ± 6.45   | < 0.001 |
| VAS (0-10)                                    | 0.0 ± 0.0         | 5.20 ± 2.84    | < 0.001 |

Data are presented as mean ± standard deviation. LBP: low back pain; VAS: visual analogue pain scale. For the Edinburgh Handedness Inventory, -100 indicates left handed whereas 100 indicates right handed; for the VAS, 0 means no pain at all and 10 means maximum pain imaginable; for the Roland-Morris Disability Questionnaire, the scores range from 0, no disability to 24, maximum disability.

Table 2. Root-mean-square EMG (mV) during maximal isometric back extension.

|         | ES T12    |           |            | ES L4     |           |            |
|---------|-----------|-----------|------------|-----------|-----------|------------|
|         | Left      | Right     | Average    | Left      | Right     | Average    |
| Control | 0.21±0.08 | 0.20±0.07 | 0.21±0.07  | 0.22±0.10 | 0.22±0.10 | 0.22±0.09  |
| LBP     | 0.13±0.07 | 0.12±0.08 | 0.12±0.07* | 0.12±0.12 | 0.14±0.07 | 0.13±0.12* |

Data are presented as mean ± standard deviation. LBP: low back pain. \*p<0.05 between the LBP group and the control group.

1  
2  
3  
4  
5  
6  
7  
8  
9  
10  
11  
12  
13  
14  
15  
16  
17  
18  
19  
20  
21  
22  
23  
24  
25  
26  
27  
28  
29  
30  
31  
32  
33  
34  
35  
36  
37  
38  
39  
40  
41  
42  
43  
44  
45  
46  
47  
48  
49

Figure 1

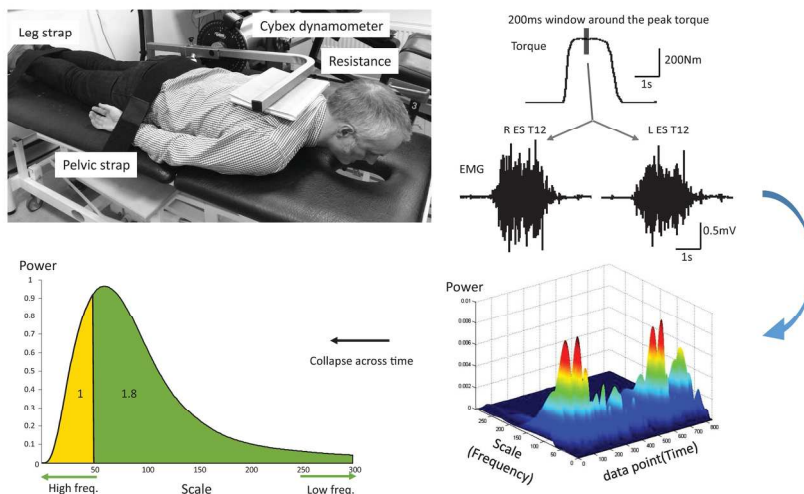

Figure 1. Experimental setup (top left) and peak torque and EMG activity recorded from left and right erector spinae at T12 (L ES and R ES) from a representative subject during one maximal voluntary isometric contraction (MVIC, top right). A representative 3 dimensional matrix of power, scale (frequency) and time calculated from a continuous wavelet transform analysis of the EMG data centred around the peak torque (bottom right). The bottom left figure represents the sum of the power collapsed across the time-window. The area under the curve has been split according to the ratio 1.8 (see data analysis) and the corresponding scale was used to split the curve derived from each patient dataset.

190x107mm (300 x 300 DPI)

Figure 2

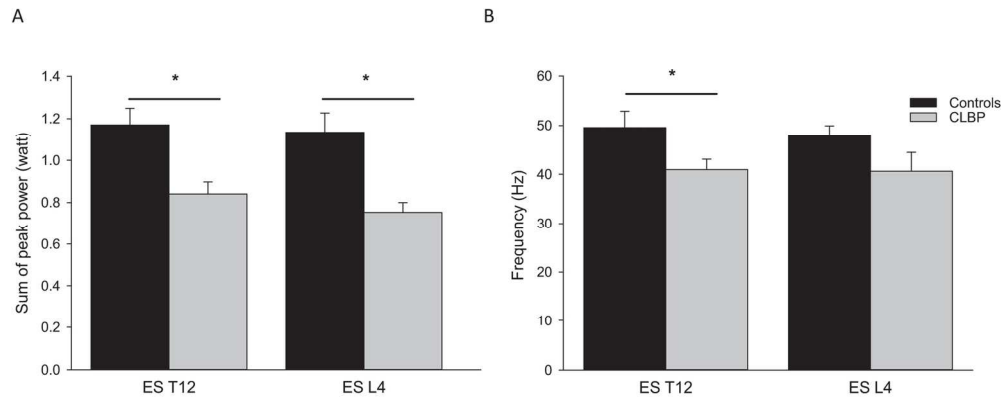

Figure 2. Group mean ( $\pm$ SEM) data showing (A) peak power and (B) its corresponding frequency from erector spinae muscles at vertebral levels T12 (ES T12) and L4 (ES L4) in the controls and in patients with LBP. \* $p < 0.05$ , between-group comparison.

147x81mm (300 x 300 DPI)

Figure 3

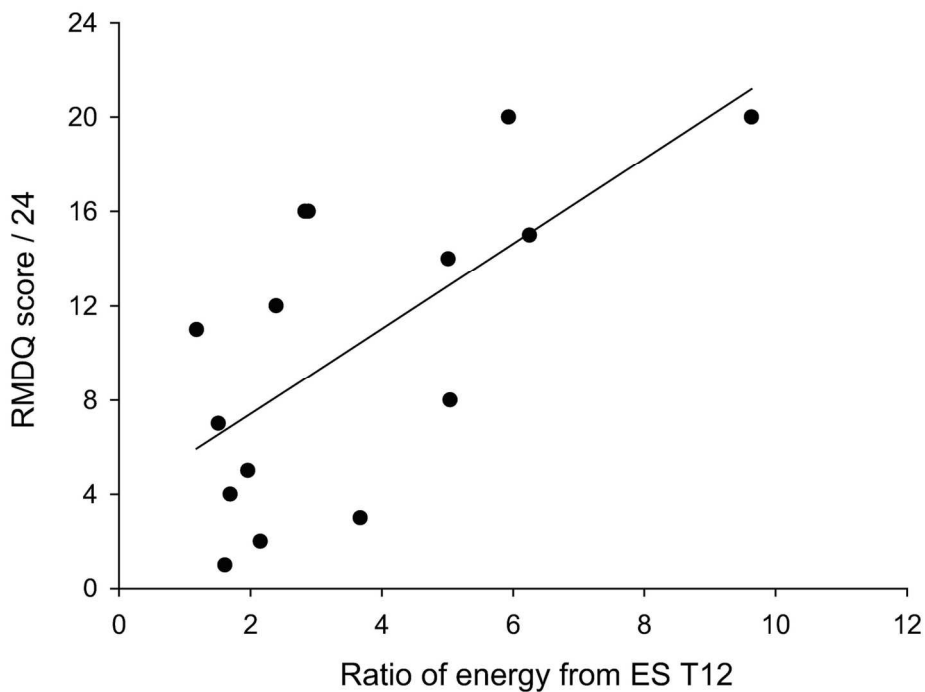

Figure 3. Correlation between the ratio of energy at low to high (low:high) frequencies and Roland-Morris Disability Questionnaire (RMDQ) in subjects with LBP.

135x115mm (300 x 300 DPI)

only



# BMJ Open

## Association between spectral characteristics of paraspinal muscles and functional disability in low back pain patients: a cohort study.

|                                 |                                                                                                                                                                                                                                                                                                                                                                |
|---------------------------------|----------------------------------------------------------------------------------------------------------------------------------------------------------------------------------------------------------------------------------------------------------------------------------------------------------------------------------------------------------------|
| Journal:                        | <i>BMJ Open</i>                                                                                                                                                                                                                                                                                                                                                |
| Manuscript ID                   | bmjopen-2017-017091.R1                                                                                                                                                                                                                                                                                                                                         |
| Article Type:                   | Research                                                                                                                                                                                                                                                                                                                                                       |
| Date Submitted by the Author:   | 06-Jun-2017                                                                                                                                                                                                                                                                                                                                                    |
| Complete List of Authors:       | Chiou, Shin-Yi; Imperial College London Department of Surgery and Cancer, Surgery and Cancer<br>Koutsos, Ermis; Imperial College London, Centre for Bio-Inspired Technology<br>Georgiou, Pantelis; Imperial College London, Centre for Bio-Inspired Technology<br>Strutton, Paul; Imperial College London Department of Surgery and Cancer, Surgery and Cancer |
| <b>Primary Subject Heading</b>: | Neurology                                                                                                                                                                                                                                                                                                                                                      |
| Secondary Subject Heading:      | Rehabilitation medicine                                                                                                                                                                                                                                                                                                                                        |
| Keywords:                       | trunk muscles, isometric, electromyography, wavelet transform, Back pain < ORTHOPAEDIC & TRAUMA SURGERY                                                                                                                                                                                                                                                        |
|                                 |                                                                                                                                                                                                                                                                                                                                                                |

SCHOLARONE™  
Manuscripts

Only

1  
2  
3 **Association between spectral characteristics of paraspinal muscles and functional disability in low**  
4  
5 **back pain patients: a cohort study.**  
6

7  
8 Shin-Yi Chiou, PhD<sup>1</sup>, Ermis Koutsos, PhD<sup>2</sup>, Pantelis Georgiou, PhD<sup>2</sup>, Paul H Strutton, PhD<sup>1,\*</sup>.  
9

10  
11 <sup>1</sup>The Nick Davey Laboratory, Human Performance Group, Division of Surgery, Department of Surgery  
12 and Cancer, Faculty of Medicine, Imperial College London, Charing Cross Hospital, London W6 8RF,  
13  
14 UK.  
15

16  
17 <sup>2</sup>Department of Electrical and Electronic Engineering, Centre for Bio-inspired Technology, Imperial  
18  
19 College London, London SW7 2AZ, UK.  
20

21  
22  
23 \* Corresponding author Address: The Nick Davey Laboratory, Human Performance Group, Division of  
24  
25 Surgery, Department of Surgery and Cancer, Faculty of Medicine, Imperial College London, W6 8RF.  
26

27  
28 Tel: +44 (0)20 331 38837; fax: +44 (0)20 331 38835. Email: [p.strutton@imperial.ac.uk](mailto:p.strutton@imperial.ac.uk)  
29  
30  
31  
32  
33  
34  
35  
36  
37  
38  
39  
40  
41  
42  
43  
44  
45  
46  
47  
48  
49  
50  
51  
52  
53  
54  
55  
56  
57  
58  
59  
60

1  
2  
3 **1 Abstract**  
4

5 **2 Objectives.** Characteristics of muscle activity, represented by surface electromyography (EMG), have  
6 revealed differences between patients with low back pain and healthy adults; how they relate to  
7  
8 functional and clinical parameters remains unclear. The purpose of the current study was to examine  
9  
10 the correlation between frequency characteristics of EMG (analysed using continuous wavelet  
11  
12 transform (CWT) analysis) and patients' self-rated score of disability.  
13  
14  
15  
16

17 **7 Design and setting.** This is a case control study with fifteen patients with mechanical low back pain  
18  
19 (LBP) without radicular symptoms. Patients were recruited from the orthopaedic clinic at Charing  
20  
21 Cross Hospital. Ten healthy adults were recruited from the staff working in the hospital and  
22  
23 associated university. Patients completed the Roland-Morris Disability Questionnaire (RMDQ) and  
24  
25 bilateral EMG activity was obtained from erector spinae at vertebral levels L4 and T12. Subjects  
26  
27 performed 3 brief maximal isometric voluntary contractions (MVCs) of the back extensors and the  
28  
29 torque was measured using a dynamometer. CWT was applied to the EMG signals of each muscle in  
30  
31 a 200ms window centred around the peak torque obtained during the MVCs. The ratio (low/high  
32  
33 frequencies) of the energy, the peak power, and the frequency of the peak power were calculated  
34  
35 for each recording site, averaged and correlated with the individual's RMDQ score.  
36  
37  
38

39 **17 Results.** Patients had lower peak power (T12 and L4) and lower frequency of the peak power (at T12)  
40  
41 than the healthy adults. Additionally, RMDQ positively correlated to the average ratio of energy at  
42  
43 T12 ( $\rho=0.63$ ;  $p=0.012$ ), i.e. greater self-rated disability corresponded to a dominant distribution of  
44  
45 energy in the lower frequencies.  
46  
47  
48

49 **21 Conclusion.** The current findings reveal alterations in EMG profile and its association with self-  
50  
51 related back pain disability, suggesting that spectral characteristics of EMG reflect muscle function.  
52  
53

54 **23 Keywords:** trunk muscles; isometric; electromyography; wavelet transform; back pain.  
55  
56  
57  
58  
59  
60

1  
2  
3 **1 Strengths and limitations of this study**  
4

- 5  
6 2 • This study uses a computational approach to decompose the signals of surface  
7  
8 3 electromyography obtained from paraspinal muscles in patients with low back pain with a view  
9  
10 4 to revealing information that may not be detected from a conventional amplitude analysis.  
11  
12 5 • The methodology of combining maximal voluntary isometric contraction of paraspinal muscles  
13  
14 6 and wavelet transform analysis offers the opportunity for a simple and quick assessment of  
15  
16 7 function of the back muscles.  
17  
18 8 • A difference in body mass between patients and controls indicates that careful interpretation of  
19  
20  
21 9 the findings are required.  
22  
23  
24  
25  
26  
27  
28  
29  
30  
31  
32  
33  
34  
35  
36  
37  
38  
39  
40  
41  
42  
43  
44  
45  
46  
47  
48  
49  
50  
51  
52  
53  
54  
55  
56  
57  
58  
59  
60

## Introduction

Low back pain (LBP) is a common health condition with 60-80% of people in the UK reporting it at some point in their lives<sup>1 2</sup>. The costs of back pain alone account for 20% of the total UK's health expenditure<sup>3</sup> and LBP is also an important cause of work absence. It has wide ranging impact upon both biological and psychosocial aspects such as physical impairments, mental health and loss of employment<sup>2 4</sup>. Evidence has shown that subjects with chronic low back pain (LBP) have changes in trunk muscle control by the central nervous system<sup>5 6</sup>, including reduced corticospinal excitability<sup>7</sup> and neural drive<sup>8</sup> in addition to anatomical changes such as in trunk muscle size and muscle fibre type which may account for observed altered activity patterns during functional tasks<sup>9 10</sup> and reductions in muscle strength and endurance<sup>11 12</sup>. Electromyographic (EMG) activity, including its temporal and spectral characteristics, has been commonly used to investigate muscle function. Changes in EMG signal amplitude are used as an indirect measure of overall muscle activity and of muscle contraction force<sup>13 14</sup>; however, the precise nature of the relationship between EMG amplitude and force output has not been established<sup>15 16</sup>. The frequency distribution of the EMG signals has been reported to be associated with the underlying muscle fibre type characteristics<sup>17 18</sup>. For example, fatigability of back muscles has shown to be related to the muscle fibre type area distribution in healthy subjects<sup>18</sup>. These observations indicate complex alterations in temporal (e.g. EMG signal amplitude) and spectral (e.g. median frequency) characteristics of muscle activity. Therefore, a simultaneous assessment of changes across these domains may provide more information on neuromuscular alterations of back muscles in patients with LBP.

Wavelet transform is a time-frequency method of signal analysis, which has been proposed to be more suitable for analysis of surface EMG since these are non-stationary<sup>19</sup> spikey<sup>20</sup> signals than short-time Fourier transform (STFT). Wavelet transform projects a signal into space comprised of functions limited in duration. This technique consists of mapping the signal in frequency and time from a series of base functions, which produces a family of ordered decompositions located in

1  
2  
3 different frequency bands. From a single basic wavelet, a so-called mother wavelet, stretching and  
4  
5 shifting (dilating and translating) the wavelet allows for discovery of the frequency content and  
6  
7 location in time of the signal <sup>21</sup>.

8  
9 Studies have shown associations between wavelet transform and muscle function. In healthy adults,  
10  
11 changes in EMG spectral power and frequency have been observed in limb and trunk muscles during  
12  
13 fatiguing exercise <sup>22 23</sup>. Previous work has demonstrated that energy distribution between low and  
14  
15 high frequency bands from leg muscles was different in individuals with diabetic neuropathy and in  
16  
17 postoperative total knee arthroplasty patients compared to controls <sup>24-26</sup>. This may be due to  
18  
19 changes in motor unit recruitment or muscle fibre type distribution in patients <sup>27 28</sup>. In patients with  
20  
21 LBP, the total power in the trunk muscles was lower and could be used to discriminate patients from  
22  
23 controls <sup>29</sup>. However, whether there are changes in energy distribution between low and high  
24  
25 frequency bands from trunk muscles and whether these changes correlate with any clinical or  
26  
27 functional scores (i.e. pain, disability) remains unclear.  
28  
29

30  
31 The purpose of the current study was to investigate whether time and frequency domain EMG  
32  
33 characteristics, obtained using continuous wavelet transform (CWT), of erector spinae muscles (ES)  
34  
35 in people with LBP are associated with levels of back pain disability and pain. We hypothesised that  
36  
37 the EMG characteristics would be different between people with LBP and controls and that the  
38  
39 energy distribution between low and high frequency bands would be associated with the level of  
40  
41 disability and/or pain.  
42

#### 43 **Materials and Methods**

##### 44 *Participants.*

45  
46  
47 With ethical approval (07/Q0410/5 - NHS NRES Committee London – Harrow) and written informed  
48  
49 consent, 15 patients with mechanical, non-specific low back pain (LBP group) were recruited from  
50  
51 the orthopaedic clinic at Charing Cross Hospital and 10 healthy controls were recruited from the  
52  
53 staff working in the hospital and associated university. Only subjects with mechanical LBP without  
54  
55  
56  
57  
58  
59  
60

1  
2  
3 radicular symptoms were included; those with back pain related to rheumatologic disease,  
4  
5 spondylolisthesis or spinal trauma or with constant severe pain were excluded. All of the subjects  
6  
7 were asked to complete the Edinburgh Handedness Inventory, a 10-item questionnaire with a score  
8  
9 between -100 (left handed) and 100 (right handed)<sup>30</sup> and a visual analogue pain scale (VAS; 0 - no  
10  
11 pain to 10 - maximum pain); patients additionally completed a 24-item Roland-Morris Disability  
12  
13 Questionnaire (RMDQ), a disease specific functional measure<sup>31</sup>; the scores range from 0, no  
14  
15 disability to 24, maximum disability.  
16

17  
18  
19 *Recordings.*

20  
21 **Torque.** Back extensor isometric torque was measured using a Cybex Norm Isokinetic Testing System  
22  
23 (CSMI Inc., Stoughton, MA, USA) with an extendable input lever arm. The output from the Cybex was  
24  
25 sampled at 500Hz by a data acquisition system [Power 1401 plus and Spike2 v5; Cambridge  
26  
27 Electronic Design (CED), Cambridge, UK] connected to a personal laptop for subsequent offline  
28  
29 analysis. **Electromyography (EMG).** Bilateral EMG recordings were obtained from the erector spinae  
30  
31 (ES) muscles at vertebral levels T12 and L4. Pairs of Ag/AgCl electrodes (self-adhesive, 2cm diameter,  
32  
33 CareFusion, UK) were positioned 3cm either side of the spinous processes, parallel to the fibre  
34  
35 orientation of ES muscles, with an inter-electrode distance of 2cm. A ground electrode was placed  
36  
37 over the left anterior superior iliac spine. The EMG signals were filtered (10Hz–1kHz), and amplified  
38  
39 (1000×; Iso-DAM, World Precision Instruments, UK) before being sampled at 4kHz by the data  
40  
41 acquisition system; both torque and EMG data were collected simultaneously.  
42  
43  
44

45  
46 *Experimental procedure.*

47  
48 The experimental setup has been used previously<sup>8 32</sup>. Briefly, subjects were positioned prone on the  
49  
50 dynamometer bench, with their ankles and hips strapped securely, to help isolate back muscle  
51  
52 movements as well as limit the contributions of hip extensors; the arms were by the sides and the  
53  
54 iliac crests were aligned with the pivot of the dynamometer lever arm. The lever arm was positioned  
55  
56 over the lower edge of the scapulae (see Fig. 1); this was confirmed by a physiotherapist (SYC) who  
57  
58  
59  
60

1  
2  
3 identified the inferior angle of the scapula for each subject by palpation. Subjects had a gentle  
4  
5 warm-up consisting of several push-ups into extension without using their arms. Following this,  
6  
7 three brief (~3s) maximal voluntary isometric contractions (MVICs) of the trunk extensors were  
8  
9 performed with at least 10 seconds interval between each contraction; consistent verbal  
10  
11 encouragement was given throughout. After each contraction, subjects were asked to indicate how  
12  
13 much effort they used on a modified Borg scale (from 0, no effort to 10, maximal effort)<sup>33</sup>.  
14  
15

#### 16 *Data analysis.*

17  
18  
19 The peak torque achieved during the 3 MVICs was identified and the EMG signals obtained during  
20  
21 the MIVC from each back muscle in a 200ms window centred on the peak torque were calculated as  
22  
23 root-mean-square amplitude (rmsEMG). They were then resolved into their respective intensities in  
24  
25 time-frequency space using a continuous wavelet transform (CWT), processed in MATLAB R2014a  
26  
27 (MathWorks, Natick, Massachusetts). Specifically, the Daubechies family of wavelet (in particular the  
28  
29 db4 wavelet) was selected for CWT decomposition due to the similarity between the wavelet and  
30  
31 the waveforms of motor unit action potentials<sup>34 35</sup>. Performing a CWT on a time waveform results in  
32  
33 a matrix of normalized coefficients calculated over scale and time. Scales were tested from 5 to 300  
34  
35 (corresponding to 595.29Hz-9.92Hz) with regards to the common signal bandwidth of surface EMG<sup>36</sup>  
36  
37<sup>37</sup>; the sum of the energy of the wavelet coefficient for the 200ms window was obtained for each  
38  
39 scale (Fig 1). The scales were then converted into their corresponding frequencies for further  
40  
41 analyses. Parameters including peak power and its corresponding frequency were obtained.  
42  
43 Furthermore, since the ratio of muscle fibre type I to type II in the ES has been reported to be  
44  
45 approximately 1.8<sup>38</sup>, the scale splitting the energy matrix into the ratio 1.8 of lower to higher energy  
46  
47 (low:high frequencies) for each muscle was identified from the controls. The scale was then used to  
48  
49 split the energy matrix obtained from the LBP group into two parts representing lower to higher  
50  
51 energy. The ratio of these two parts from the energy matrix was then calculated for each muscle for  
52  
53 individuals in the LBP group.  
54  
55  
56  
57  
58  
59  
60



### *Statistical analysis.*

Data were analysed using Statistical Program for the Social Sciences (SPSS) version 22 (IBM Corp, Armonk, NY). Demographic data and modified Borg scale scores were compared between the control group and the LBP group using independent-t tests and Chi-Square tests for scale data and for nominal data (gender), respectively. Normal distribution was tested by the Shapiro-Wilk test for spectral parameters and rmsEMG; since the variables of frequency at the peak power and the ratio were not normally distributed ( $p < 0.05$ ) and our sample sizes of two groups were not equal, non-parametric tests were applied. Wilcoxon Signed Rank tests and Mann-Whitney  $U$  tests were used to examine within-group and between-group differences, respectively. Within-group comparisons were made between left and right sides for rmsEMG at T12 and L4; between-group comparisons were made between rmsEMG, peak power and its corresponding frequency and the ratio of energy. Given that this ratio was based on the presumed ratio of muscle fibre type I to type II in the ES<sup>38</sup>, Spearman correlation coefficients were performed between the scores of questionnaires (RMDQ and VAS) and the ratio of energy in the LBP group. Statistical significance was set at  $p < 0.05$  and Bonferroni correction was applied to allow for multiple comparisons.

## **Results**

### *Group characteristics.*

Demographic data of the groups are shown in Table 1. The median (interquartile range) duration of back pain episode was 20 (22) months in patients with LBP. Of 15 patients with LBP, 6 had pain on the right side and 9 had bilateral pain. The MVIC torque (normalized to body mass) of patients was smaller than that of controls (mean $\pm$ SD: LBP: 2.88 $\pm$ 1.03 Nm/kg; C: 4.11 $\pm$ 1.42Nm/kg;  $Z = -2.16$ ;  $p = 0.03$ ). Further, the VAS reported by patients was 5.2 $\pm$ 2.84; as anticipated, controls reported no pain (i.e. 0.0). All subjects completed all aspects of the protocol; no data were excluded from analyses. During the MVICs, the modified Borg scale scores reported by the subjects were not different between the groups (LBP: 8.80 $\pm$ 1.04; C: 9.42 $\pm$ 0.60;  $p = 0.07$ ).

1  
2  
3 *Root-mean-square (RMS) EMG.*  
4

5  
6 There was no side difference in rms EMG in the LBP group (T12:  $Z=-1.36$ ;  $p=0.18$ ; L4:  $Z=-1.07$ ;  $p=0.29$ )  
7  
8 or in the controls (T12:  $Z=-0.30$ ;  $p=0.77$ ; L4:  $Z=-0.15$ ;  $p=0.88$ ; Table 2). The mean rmsEMG, averaged  
9  
10 from left and right ES, at T12 and L4 vertebral levels was significantly lower in the LBP group than in  
11  
12 the controls (T12:  $Z=-2.69$ ;  $p=0.007$ ; L4:  $Z=-2.33$ ;  $p=0.02$ ; Table 2).  
13

14  
15 *Spectral parameters.*  
16

17  
18 The peak power (Fig 2A) and its corresponding frequency (Fig 2B) of the transformed EMG were  
19  
20 different between the two groups. For the ES T12, the peak power and its corresponding frequency  
21  
22 were lower in the LBP group (peak power:  $0.84\pm 0.22$ ; frequency:  $40.94\pm 8.21\text{Hz}$ ) than in the controls  
23  
24 (peak power:  $1.17\pm 0.25$ ; frequency:  $49.56\pm 10.56\text{Hz}$ ; peak power:  $Z=-2.88$ ;  $p=0.004$ ; frequency:  $Z=-$   
25  
26  $2.16$ ;  $p=0.030$ ; Fig 2). For the ES L4, the peak power was lower in the LBP group (peak power:  
27  
28  $0.75\pm 0.18$ ) than in the controls (peak power:  $1.13\pm 0.29$ ;  $Z=-2.99$ ;  $p=0.003$ ; Fig 2A), whereas its  
29  
30 corresponding frequency (LBP group:  $40.64\pm 14.81\text{Hz}$ ; control group:  $47.97\pm 6.16\text{Hz}$ ) was not different  
31  
32 between two groups ( $Z=-1.66$ ;  $p=0.096$ ; Fig 2B).  
33

34  
35  
36 In the controls, the mean ( $\pm$ SD) scales splitting the energy matrix into the ratio to  $\sim 1.8$  of low to high  
37  
38 energy for T12 (the mean ratio was  $1.72\pm 0.05$ ) and L4 ( $1.74\pm 0.04$ ) were  $36.8\pm 10.52$  and  $34.25\pm 9.60$ ,  
39  
40 respectively; the corresponding frequencies were 87Hz for T12 and 96Hz for L4. The splitting scales  
41  
42 used in the LBP group were therefore 37 for T12 and 34 for L4; the mean ratios (low/high) at these  
43  
44 two scales were  $3.56\pm 2.36$  for T12 ( $Z=-2.11$ ;  $p=0.035$ , compared to the control group) and  $4.32\pm 3.19$   
45  
46 for L4 ( $Z=-1.94$ ;  $p=0.052$ ) scales in the LBP group. Spearman correlation analysis showed a  
47  
48 correlation between the ratios from ES T12 and the RMDQ scores ( $\rho=0.63$ ;  $p=0.012$ ; Fig 3);  
49  
50 however, the ratios from ES L4 did not significantly correlate with the RMDQ scores ( $\rho=0.47$ ;  
51  
52  $p=0.075$ ). The ratios did not correlate with the VAS scores (ES T12:  $\rho=0.09$ ;  $p=0.76$ . ES L4:  
53  
54  $\rho=0.01$ ;  $p=0.96$   $p>0.05$ ).  
55  
56  
57  
58  
59  
60

## Discussion

The current study used continuous wavelet transform to decompose the surface EMG signals recorded from the ES during maximal isometric back extensions performed by patients with LBP and controls. In patients with LBP, there was a lower peak power in ES T12 and L4 and the overall energy distribution in ES T12 was shifted toward lower frequencies than in the controls. Moreover, the ratios of energy between low and high frequencies, calculated from ES T12, correlated with patients' self-rated back pain disability which may highlight the potential clinical application of wavelet analysis in monitoring the progression of, or response to treatment, for back pain.

Frequency analysis has been widely applied to analyse EMG signals recorded from paraspinal muscles in patients with chronic LBP and short-time Fourier transform (STFT) has been used in the majority of studies. Mean and median frequencies were lower in patients with chronic LBP than in controls<sup>29 39</sup>; however, controversial results are still reported<sup>40 41</sup>. Although there is evidence that analysis of back muscle EMG activity using STFT and wavelet transform provides similar information<sup>23 42 43</sup>, some studies suggest that wavelet transform could detect changes in muscle fatigue earlier and be more sensitive than the STFT<sup>44-46</sup>. A recent study used discrete wavelet transform on surface EMG of trunk muscles during the contraction in subjects with chronic LBP and in controls. Patients with chronic LBP had lower spectral power in the trunk muscles compared to the healthy subjects<sup>29</sup>; however, their study did not include any subjective measurements (e.g. pain scores, disability scores) or compare energy distribution between low and high frequency bands, which may reflect alterations in motor unit recruitment or muscle fibre type distributions. Our results show patients with LBP presented different EMG characteristics from healthy subjects, including lower peak power (both ES T12 and L4) and its corresponding frequency (ES T12), and higher ratio of energy between low and high frequencies (ES T12), in line with previous findings that patients with chronic LBP have an overall shift of energy distribution toward lower frequencies in the back muscles<sup>47</sup>. We further demonstrate a correlation between the energy distribution calculated from the EST12 and the

1  
2  
3 RMDQ, indicating an association between muscle function and self-rated disability. However, the  
4  
5 reduced volume muscle at the lumbar level <sup>38</sup> might explain the differences in the findings between  
6  
7 ES T12 and L4 levels. Together with previous work showing that EMG variables recorded from ES  
8  
9 may identify people at increased risk of developing low back pain in two years <sup>48</sup>, we suggest that  
10  
11 the EMG characteristics could be useful in clinics to monitor progression of back pain as well as the  
12  
13 effectiveness of therapeutic interventions.  
14

15  
16 Changes in spectral energy from leg and thigh muscles have been found in individuals with diabetic  
17  
18 neuropathy and are suggested to be related to alterations in muscle recruitment strategies due to  
19  
20 the loss of type I fibres in this population <sup>25</sup>. Studies have shown that instantaneous spectra derived  
21  
22 from wavelet decomposition of EMG signals are associated with activity from different muscle fibre  
23  
24 types using a range of approaches including electrical nerve stimulation <sup>28</sup> and voluntary  
25  
26 contractions <sup>49</sup>. In addition, previous findings using conventional Fourier transformation  
27  
28 demonstrated a correlation between the change in median frequency in ES during fatiguing exercise  
29  
30 and the relative area of the muscle occupied by type I fibres in healthy subjects <sup>18</sup>. Anatomical  
31  
32 evidence from biopsy studies is equivocal, with some studies demonstrating differences in muscle  
33  
34 fibre-type proportions in paraspinal muscles between patients with LBP and healthy subjects <sup>50 51</sup>,  
35  
36 whilst others show no differences <sup>52 53</sup>. Nevertheless, studies using twitch interpolation to assess  
37  
38 central neural drive to muscles suggest that decreases in time-to-peak amplitude of superimposed  
39  
40 twitches at increasing levels of voluntary contraction reflect the recruitment of different types of  
41  
42 motor units <sup>32 54-56</sup>. Further, given patients with chronic LBP have been shown to exhibit longer time-  
43  
44 to-peak amplitudes of twitches during MVICs, this supports the view that these patients have  
45  
46 alterations in muscle fibre-type composition <sup>8</sup>. In the current study, the spectra obtained from the  
47  
48 patients with LBP had a shift in the peak power towards the lower frequencies; this might reflect  
49  
50 alterations in motor control or in muscle fibre-type proportions. Further, the correlation between  
51  
52 the EMG spectral characteristics and back pain-related disability scores suggests that altered motor  
53  
54 control or fibre-type proportions of paraspinal muscles has an impact on functional activities, which  
55  
56  
57  
58  
59  
60

1  
2  
3 is reflected in higher disability scores. This highlights the importance of rehabilitation to restore  
4  
5 muscle function in patients with LBP, which may reduce the levels of disability reported in these  
6  
7 patients.  
8

9  
10 The approach used in the current study may provide a valuable tool for clinical assessment. Surface  
11  
12 EMG recordings are easy to use in clinics and the task is feasible for people with chronic LBP as all of  
13  
14 our patients were able to perform the 3 maximal isometric back extensions. While factors such as  
15  
16 fear avoidance or pain inhibition likely affect muscle activity, our subjects were asked to report pain  
17  
18 levels during the MVICs and also to give an indication (on a modified Borg scale) of the degree of  
19  
20 effort used to perform the MVICs. Patients reported no increase in pain, and levels of effort  
21  
22 comparable to the controls. Wavelet transform is a robust approach for the surface EMG signal and  
23  
24 could reveal extra features which may be useful to monitor subtle changes in muscle function during  
25  
26 rehabilitation. A further study to test whether the wavelet approach is able to detect the therapeutic  
27  
28 effect on muscle function is therefore warranted.  
29  
30

31  
32 In conclusion, the patients with LBP recruited in the current study had lower maximal force of the  
33  
34 back extensors and smaller ES muscle activity during the MVICs. The wavelet transform further  
35  
36 revealed alterations in EMG profile and its association with the self-related back pain disability,  
37  
38 indicating that spectral characteristics of EMG reflect muscle function.  
39  
40

#### 41 **Acknowledgments**

42  
43  
44 We would like to thank all participants of this study.  
45  
46  
47  
48  
49

50 **Funding statement:** There was no funding or other form of support for this project.  
51

52  
53 **Competing interests:** None declared.  
54

55  
56 **Author's contributions:** SYC and PHS conceived and designed the study. SYC and PHS conducted the  
57  
58 experiment. SYC, EK and PHS analysed the data and interpreted the data. PG provided guidance on  
59  
60

1  
2  
3 the data analysis. All authors drafted the manuscript and read, edited and approved the final version  
4  
5 of the manuscript. All authors had full access to all of the data in the study and can take  
6  
7 responsibility for the integrity of the data and the accuracy of the data analysis.  
8  
9

10 **Data sharing statement:** No additional data are available.  
11  
12

## 13 14 15 **References**

- 16  
17  
18 1. Macfarlane GJ, Thomas E, Croft PR, et al. Predictors of early improvement in low back pain  
19 amongst consulters to general practice: the influence of pre-morbid and episode-related  
20 factors. *Pain* 1999;80(1-2):113-9.
- 21  
22 2. Dunn KM, Croft PR. Epidemiology and natural history of low back pain. *Eura Medicophys*  
23 2004;40(1):9-13.
- 24  
25 3. Maniadakis N, Gray A. The economic burden of back pain in the UK. *Pain* 2000;84(1):95-103.
- 26  
27 4. Chou R, Qaseem A, Snow V, et al. Diagnosis and treatment of low back pain: a joint clinical  
28 practice guideline from the American College of Physicians and the American Pain Society.  
29 *Ann Intern Med* 2007;147(7):478-91.
- 30  
31 5. Hodges PW, Moseley GL, Gabrielsson A, et al. Experimental muscle pain changes feedforward  
32 postural responses of the trunk muscles. *Exp Brain Res* 2003;151(2):262-71. doi:  
33 10.1007/s00221-003-1457-x
- 34  
35 6. Strutton PH, Theodorou S, Catley M, et al. Corticospinal excitability in patients with chronic low  
36 back pain. *J Spinal Disord Tech* 2005;18(5):420-4.
- 37  
38 7. Tsao H, Danneels LA, Hodges PW. Smudging the motor brain in young adults with recurrent low  
39 back pain. *Spine (Phila Pa 1976)* 2011;36(21):1721-7. doi: 10.1097/BRS.0b013e31821c4267  
40 [published Online First: 2011/04/22]
- 41  
42 8. Chiou SY, Shih YF, Chou LW, et al. Impaired neural drive in patients with low back pain. *European*  
43 *journal of pain* 2014;18(6):794-802.
- 44  
45 9. Dubois JD, Piche M, Cantin V, et al. Effect of experimental low back pain on neuromuscular control  
46 of the trunk in healthy volunteers and patients with chronic low back pain. *Journal of*  
47 *electromyography and kinesiology : official journal of the International Society of*  
48 *Electrophysiological Kinesiology* 2011;21(5):774-81. doi: 10.1016/j.jelekin.2011.05.004
- 49  
50 10. D'Hooge R, Hodges P, Tsao H, et al. Altered trunk muscle coordination during rapid trunk flexion  
51 in people in remission of recurrent low back pain. *Journal of electromyography and*  
52 *kinesiology : official journal of the International Society of Electrophysiological Kinesiology*  
53 2013;23(1):173-81. doi: 10.1016/j.jelekin.2012.09.003
- 54  
55 11. Nicolaisen T, Jorgensen K. Trunk strength, back muscle endurance and low-back trouble. *Scand J*  
56 *Rehabil Med* 1985;17(3):121-7.
- 57  
58 12. Roy SH, De Luca CJ, Casavant DA. Lumbar muscle fatigue and chronic lower back pain. *Spine*  
59 *(Phila Pa 1976)* 1989;14(9):992-1001.
- 60  
61 13. Pitcher MJ, Behm DG, MacKinnon SN. Reliability of electromyographic and force measures during  
62 prone isometric back extension in subjects with and without low back pain. *Applied*  
63 *physiology, nutrition, and metabolism = Physiologie appliquee, nutrition et metabolisme*  
64 2008;33(1):52-60. doi: 10.1139/H07-132
- 65  
66 14. Hubley-Kozey CL, Vezina MJ. Differentiating temporal electromyographic waveforms between  
67 those with chronic low back pain and healthy controls. *Clin Biomech (Bristol, Avon)*  
68 2002;17(9-10):621-9.

15. Huebner A, Faenger B, Scholle HC, et al. Re-evaluation of the amplitude-force relationship of trunk muscles. *Journal of biomechanics* 2015;48(6):1198-205. doi: 10.1016/j.jbiomech.2015.02.016
16. Kumar S, Narayan Y. Torque and EMG in isometric graded flexion-rotation and extension-rotation. *Ergonomics* 2001;44(8):795-813. doi: 10.1080/00140130110045802
17. Gerdle B, Karlsson S, Crenshaw AG, et al. The influences of muscle fibre proportions and areas upon EMG during maximal dynamic knee extensions. *European journal of applied physiology* 2000;81(1-2):2-10. doi: 10.1007/PL00013792
18. Mannion AF, Dumas GA, Stevenson JM, et al. The influence of muscle fiber size and type distribution on electromyographic measures of back muscle fatigability. *Spine (Phila Pa 1976)* 1998;23(5):576-84.
19. Karlsson S, Yu J, Akay M. Time-frequency analysis of myoelectric signals during dynamic contractions: a comparative study. *IEEE Trans Biomed Eng* 2000;47(2):228-38. doi: 10.1109/10.821766
20. Karlsson S, Yu J, Akay M. Enhancement of spectral analysis of myoelectric signals during static contractions using wavelet methods. *IEEE Trans Biomed Eng* 1999;46(6):670-84.
21. von Tscharner V. Intensity analysis in time-frequency space of surface myoelectric signals by wavelets of specified resolution. *Journal of electromyography and kinesiology : official journal of the International Society of Electrophysiological Kinesiology* 2000;10(6):433-45.
22. Chowdhury SK, Nimbarte AD, Jaridi M, et al. Discrete wavelet transform analysis of surface electromyography for the fatigue assessment of neck and shoulder muscles. *Journal of electromyography and kinesiology : official journal of the International Society of Electrophysiological Kinesiology* 2013;23(5):995-1003. doi: 10.1016/j.jelekin.2013.05.001
23. Coorevits P, Danneels L, Cambier D, et al. Test-retest reliability of wavelet - and Fourier based EMG (instantaneous) median frequencies in the evaluation of back and hip muscle fatigue during isometric back extensions. *Journal of electromyography and kinesiology : official journal of the International Society of Electrophysiological Kinesiology* 2008;18(5):798-806. doi: 10.1016/j.jelekin.2007.01.007
24. Weiderpass HA, Pachi CG, Yamamoto JF, et al. Time-frequency analysis methods for detecting effects of diabetic neuropathy. *Int J Numer Method Biomed Eng* 2013;29(9):1000-10. doi: 10.1002/cnm.2545
25. Sacco IC, Hamamoto AN, Onodera AN, et al. Motor strategy patterns study of diabetic neuropathic individuals while walking. A wavelet approach. *Journal of biomechanics* 2014;47(10):2475-82. doi: 10.1016/j.jbiomech.2014.04.007
26. Kuntze G, von Tscharner V, Hutchison C, et al. Alterations in lower limb multimuscle activation patterns during stair climbing in female total knee arthroplasty patients. *J Neurophysiol* 2015;114(5):2718-25. doi: 10.1152/jn.00370.2015
27. Solomonow M, Baten C, Smit J, et al. Electromyogram power spectra frequencies associated with motor unit recruitment strategies. *J Appl Physiol (1985)* 1990;68(3):1177-85.
28. Wakeling JM, Syme DA. Wave properties of action potentials from fast and slow motor units of rats. *Muscle & nerve* 2002;26(5):659-68. doi: 10.1002/mus.10263
29. Kumar S, Prasad N. Torso muscle EMG profile differences between patients of back pain and control. *Clin Biomech (Bristol, Avon)* 2010;25(2):103-9. doi: 10.1016/j.clinbiomech.2009.10.013
30. Oldfield RC. The assessment and analysis of handedness: the Edinburgh inventory. *Neuropsychologia* 1971;9(1):97-113.
31. Roland M, Fairbank J. The Roland-Morris Disability Questionnaire and the Oswestry Disability Questionnaire. *Spine (Phila Pa 1976)* 2000;25(24):3115-24.
32. Chiou SY, Jeevathol A, Odedra A, et al. Voluntary activation of trunk extensors appears normal in young adults who have recovered from low back pain. *Eur J Pain* 2015;19(10):1506-15. doi: 10.1002/ejp.684

- 1  
2  
3 33. Borg GA. Psychophysical bases of perceived exertion. *Medicine and science in sports and exercise*  
4 1982;14(5):377-81.
- 5 34. Beck TW, Housh TJ, Johnson GO, et al. Comparison of the fast Fourier transform and continuous  
6 wavelet transform for examining mechanomyographic frequency versus eccentric torque  
7 relationships. *J Neurosci Methods* 2006;150(1):59-66. doi: 10.1016/j.jneumeth.2005.06.003
- 8 35. Croce R, Miller J, Chamberlin K, et al. Wavelet analysis of quadriceps power spectra and  
9 amplitude under varying levels of contraction intensity and velocity. *Muscle & nerve*  
10 2014;50(5):844-53. doi: 10.1002/mus.24230
- 11 36. van Boxtel A. Optimal signal bandwidth for the recording of surface EMG activity of facial, jaw,  
12 oral, and neck muscles. *Psychophysiology* 2001;38(1):22-34.
- 13 37. Rosenburg R, Seidel H. Electromyography of lumbar erector spinae muscles--influence of  
14 posture, interelectrode distance, strength, and fatigue. *Eur J Appl Physiol Occup Physiol*  
15 1989;59(1-2):104-14.
- 16 38. Mannion AF, Dumas GA, Cooper RG, et al. Muscle fibre size and type distribution in thoracic and  
17 lumbar regions of erector spinae in healthy subjects without low back pain: normal values  
18 and sex differences. *J Anat* 1997;190 ( Pt 4):505-13.
- 19 39. Linsinski P. Surface EMG in chronic low back pain. *European spine journal : official publication of*  
20 *the European Spine Society, the European Spinal Deformity Society, and the European Section*  
21 *of the Cervical Spine Research Society* 2000;9(6):559-62.
- 22 40. Kramer M, Ebert V, Kinzl L, et al. Surface electromyography of the paravertebral muscles in  
23 patients with chronic low back pain. *Archives of physical medicine and rehabilitation*  
24 2005;86(1):31-6.
- 25 41. Humphrey AR, Nargol AV, Jones AP, et al. The value of electromyography of the lumbar  
26 paraspinal muscles in discriminating between chronic-low-back-pain sufferers and normal  
27 subjects. *European spine journal : official publication of the European Spine Society, the*  
28 *European Spinal Deformity Society, and the European Section of the Cervical Spine Research*  
29 *Society* 2005;14(2):175-84. doi: 10.1007/s00586-004-0792-3
- 30 42. da Silva RA, Lariviere C, Arsenault AB, et al. The comparison of wavelet- and Fourier-based  
31 electromyographic indices of back muscle fatigue during dynamic contractions: validity and  
32 reliability results. *Electromyography and clinical neurophysiology* 2008;48(3-4):147-62.
- 33 43. Coorevits P, Danneels L, Cambier D, et al. Correlations between short-time Fourier- and  
34 continuous wavelet transforms in the analysis of localized back and hip muscle fatigue  
35 during isometric contractions. *Journal of electromyography and kinesiology : official journal*  
36 *of the International Society of Electrophysiological Kinesiology* 2008;18(4):637-44. doi:  
37 10.1016/j.jelekin.2007.01.006
- 38 44. Chowdhury SK, Nimbarte AD. Comparison of Fourier and wavelet analysis for fatigue assessment  
39 during repetitive dynamic exertion. *Journal of electromyography and kinesiology : official*  
40 *journal of the International Society of Electrophysiological Kinesiology* 2015;25(2):205-13.  
41 doi: 10.1016/j.jelekin.2014.11.005
- 42 45. Pope MH, Aleksiev A, Panagiotacopoulos ND, et al. Evaluation of low back muscle surface EMG  
43 signals using wavelets. *Clin Biomech (Bristol, Avon)* 2000;15(8):567-73.
- 44 46. Penailillo L, Silvestre R, Nosaka K. Changes in surface EMG assessed by discrete wavelet  
45 transform during maximal isometric voluntary contractions following supramaximal cycling.  
46 *Eur J Appl Physiol* 2013;113(4):895-904. doi: 10.1007/s00421-012-2499-1
- 47 47. Sparto PJ, Parnianpour M, Barria EA, et al. Wavelet analysis of electromyography for back muscle  
48 fatigue detection during isokinetic constant-torque exertions. *Spine (Phila Pa 1976)*  
49 1999;24(17):1791-8.
- 50 48. Heydari A, Nargol AV, Jones AP, et al. EMG analysis of lumbar paraspinal muscles as a predictor  
51 of the risk of low-back pain. *European spine journal : official publication of the European*  
52 *Spine Society, the European Spinal Deformity Society, and the European Section of the*  
53 *Cervical Spine Research Society* 2010;19(7):1145-52. doi: 10.1007/s00586-010-1277-1
- 54  
55  
56  
57  
58  
59  
60



- 1  
2  
3 49. Wakeling JM, Rozitis AI. Spectral properties of myoelectric signals from different motor units in  
4 the leg extensor muscles. *J Exp Biol* 2004;207(Pt 14):2519-28. doi: 10.1242/jeb.01042  
5 50. Bajek S, Bobinac D, Bajek G, et al. Muscle fiber type distribution in multifidus muscle in cases of  
6 lumbar disc herniation. *Acta medica Okayama* 2000;54(6):235-41.  
7 51. Mannion AF, Weber BR, Dvorak J, et al. Fibre type characteristics of the lumbar paraspinal  
8 muscles in normal healthy subjects and in patients with low back pain. *Journal of*  
9 *orthopaedic research : official publication of the Orthopaedic Research Society*  
10 1997;15(6):881-87. doi: 10.1002/jor.1100150614  
11 52. Mattila M, Hurme M, Alaranta H, et al. The multifidus muscle in patients with lumbar disc  
12 herniation. A histochemical and morphometric analysis of intraoperative biopsies. *Spine*  
13 *(Phila Pa 1976)* 1986;11(7):732-8.  
14 53. Crossman K, Mahon M, Watson PJ, et al. Chronic low back pain-associated paraspinal muscle  
15 dysfunction is not the result of a constitutionally determined "adverse" fiber-type  
16 composition. *Spine (Phila Pa 1976)* 2004;29(6):628-34.  
17 54. Milner-Brown HS, Stein RB, Yemm R. The orderly recruitment of human motor units during  
18 voluntary isometric contractions. *J Physiol* 1973;230(2):359-70.  
19 55. Henneman E, Somjen G, Carpenter DO. Excitability and inhibitability of motoneurons of different  
20 sizes. *J Neurophysiol* 1965;28(3):599-620.  
21 56. Bottle E, Strutton PH. Relationship between back muscle endurance and voluntary activation.  
22 *Journal of electromyography and kinesiology : official journal of the International Society of*  
23 *Electrophysiological Kinesiology* 2012;22(3):383-90. doi: 10.1016/j.jelekin.2012.02.006;  
24 10.1016/j.jelekin.2012.02.006  
25  
26  
27  
28  
29  
30  
31  
32  
33  
34  
35  
36  
37  
38  
39  
40  
41  
42  
43  
44  
45  
46  
47  
48  
49  
50  
51  
52  
53  
54  
55  
56  
57  
58  
59  
60

1  
2  
3 **1 Figure Captions**  
4

5  
6 **2 Figure 1.** Experimental setup (top left) and peak torque and EMG activity recorded from left and  
7  
8 right erector spinae at T12 (L ES and R ES) from a representative subject during one maximal  
9  
10 voluntary isometric contraction (MVIC, top right). A representative 3 dimensional matrix of power,  
11  
12 scale (frequency) and time calculated from a continuous wavelet transform analysis of the EMG data  
13  
14 centred around the peak torque (bottom right). The bottom left figure represents the sum of the  
15  
16 power collapsed across the time-window. The area under the curve has been split according to the  
17  
18 ratio 1.8 (see data analysis) and the corresponding scale was used to split the curve derived from  
19  
20 each patient dataset.  
21  
22

23  
24 **10 Figure 2.** Group mean ( $\pm$ SEM) data showing (A) peak power and (B) its corresponding frequency  
25  
26 from erector spinae muscles at vertebral levels T12 (ES T12) and L4 (ES L4) in the controls and in  
27  
28 patients with LBP. \* $p < 0.05$ , between-group comparison.  
29  
30

31 **13 Figure 3.** Correlation between the ratio of energy at low to high (low:high) frequencies and Roland-  
32  
33 Morris Disability Questionnaire (RMDQ) in subjects with LBP.  
34  
35  
36  
37  
38  
39  
40  
41  
42  
43  
44  
45  
46  
47  
48  
49  
50  
51  
52  
53  
54  
55  
56  
57  
58  
59  
60

Table 1. Demographic data.

| Characteristics                               | Controls (n = 10) | LBP (n = 15)   | P value |
|-----------------------------------------------|-------------------|----------------|---------|
| Age (years)                                   | 44.6 ± 7.9        | 43.5 ± 6.3     | 0.72    |
| Gender                                        | 5Male; 5Female    | 6Male; 9Female | 0.70    |
| Body stature (m)                              | 1.70 ± 0.09       | 1.70 ± 0.07    | 0.95    |
| Body mass (kg)                                | 72.37 ± 10.32     | 87.67 ± 24.39  | 0.04    |
| Edinburgh Handedness Inventory                | 64.44 ± 54.34     | 79.00 ± 33.21  | 0.51    |
| Roland-Morris Disability Questionnaire (0-24) | 0.0 ± 0.0         | 10.27 ± 6.45   | <0.001  |
| VAS (0-10)                                    | 0.0 ± 0.0         | 5.20±2.84      | <0.001  |

Data are presented as mean ± standard deviation. LBP: low back pain; VAS: visual analogue pain scale. For the Edinburgh Handedness Inventory, -100 indicates left handed whereas 100 indicates right handed; for the VAS, 0 means no pain at all and 10 means maximum pain imaginable; for the Roland-Morris Disability Questionnaire, the scores range from 0, no disability to 24, maximum disability.

Table 2. Root-mean-square EMG (mV) during maximal isometric back extension.

|         | ES T12    |           |            | ES L4     |           |            |
|---------|-----------|-----------|------------|-----------|-----------|------------|
|         | Left      | Right     | Average    | Left      | Right     | Average    |
| Control | 0.21±0.08 | 0.20±0.07 | 0.21±0.07  | 0.22±0.10 | 0.22±0.10 | 0.22±0.09  |
| LBP     | 0.13±0.07 | 0.12±0.08 | 0.12±0.07* | 0.12±0.12 | 0.14±0.07 | 0.13±0.12* |

Data are presented as mean ± standard deviation. LBP: low back pain. \*p<0.05 between the LBP group and the control group.

1  
2  
3  
4  
5  
6  
7  
8  
9  
10  
11  
12  
13  
14  
15  
16  
17  
18  
19  
20  
21  
22  
23  
24  
25  
26  
27  
28  
29  
30  
31  
32  
33  
34  
35  
36  
37  
38  
39  
40  
41  
42  
43  
44  
45  
46  
47  
48  
49

Figure 1

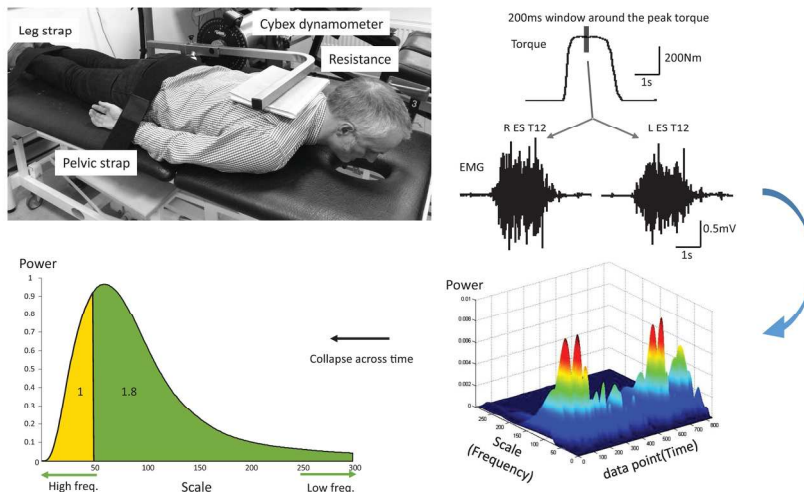

Figure 1. Experimental setup (top left) and peak torque and EMG activity recorded from left and right erector spinae at T12 (L ES and R ES) from a representative subject during one maximal voluntary isometric contraction (MVIC, top right). A representative 3 dimensional matrix of power, scale (frequency) and time calculated from a continuous wavelet transform analysis of the EMG data centred around the peak torque (bottom right). The bottom left figure represents the sum of the power collapsed across the time-window. The area under the curve has been split according to the ratio 1.8 (see data analysis) and the corresponding scale was used to split the curve derived from each patient dataset.

190x107mm (300 x 300 DPI)

Figure 2



Figure 2. Group mean ( $\pm$ SEM) data showing (A) peak power and (B) its corresponding frequency from erector spinae muscles at vertebral levels T12 (ES T12) and L4 (ES L4) in the controls and in patients with LBP. \* $p < 0.05$ , between-group comparison.

147x81mm (300 x 300 DPI)

Figure 3

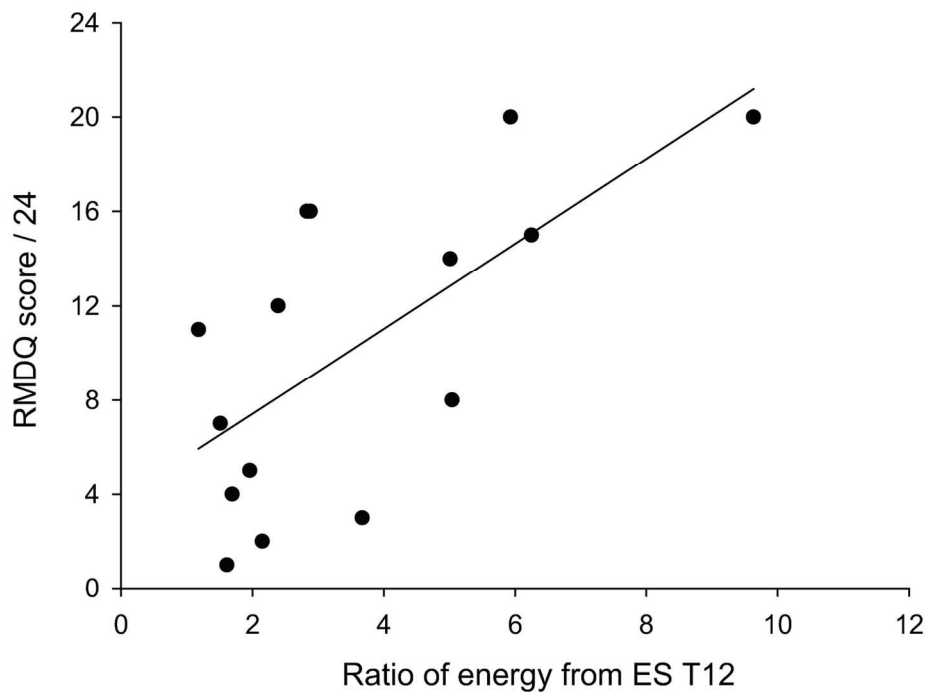

Figure 3. Correlation between the ratio of energy at low to high (low:high) frequencies and Roland-Morris Disability Questionnaire (RMDQ) in subjects with LBP.

135x115mm (300 x 300 DPI)

only

# BMJ Open

## Association between spectral characteristics of paraspinal muscles and functional disability in low back pain patients: a cohort study.

|                                 |                                                                                                                                                                                                                                                                                                                                                                |
|---------------------------------|----------------------------------------------------------------------------------------------------------------------------------------------------------------------------------------------------------------------------------------------------------------------------------------------------------------------------------------------------------------|
| Journal:                        | <i>BMJ Open</i>                                                                                                                                                                                                                                                                                                                                                |
| Manuscript ID                   | bmjopen-2017-017091.R2                                                                                                                                                                                                                                                                                                                                         |
| Article Type:                   | Research                                                                                                                                                                                                                                                                                                                                                       |
| Date Submitted by the Author:   | 29-Jun-2017                                                                                                                                                                                                                                                                                                                                                    |
| Complete List of Authors:       | Chiou, Shin-Yi; Imperial College London Department of Surgery and Cancer, Surgery and Cancer<br>Koutsos, Ermis; Imperial College London, Centre for Bio-Inspired Technology<br>Georgiou, Pantelis; Imperial College London, Centre for Bio-Inspired Technology<br>Strutton, Paul; Imperial College London Department of Surgery and Cancer, Surgery and Cancer |
| <b>Primary Subject Heading</b>: | Neurology                                                                                                                                                                                                                                                                                                                                                      |
| Secondary Subject Heading:      | Rehabilitation medicine                                                                                                                                                                                                                                                                                                                                        |
| Keywords:                       | trunk muscles, isometric, electromyography, wavelet transform, Back pain < ORTHOPAEDIC & TRAUMA SURGERY                                                                                                                                                                                                                                                        |
|                                 |                                                                                                                                                                                                                                                                                                                                                                |

SCHOLARONE™  
Manuscripts

Only



1  
2  
3 **Association between spectral characteristics of paraspinal muscles and functional disability in low**  
4  
5 **back pain patients: a cohort study.**  
6

7  
8 Shin-Yi Chiou, PhD<sup>1</sup>, Ermis Koutsos, PhD<sup>2</sup>, Pantelis Georgiou, PhD<sup>2</sup>, Paul H Strutton, PhD<sup>1,\*</sup>.  
9

10  
11 <sup>1</sup>The Nick Davey Laboratory, Human Performance Group, Division of Surgery, Department of Surgery  
12 and Cancer, Faculty of Medicine, Imperial College London, Charing Cross Hospital, London W6 8RF,  
13  
14 UK.  
15

16  
17 <sup>2</sup>Department of Electrical and Electronic Engineering, Centre for Bio-inspired Technology, Imperial  
18  
19 College London, London SW7 2AZ, UK.  
20

21  
22  
23 \* Corresponding author Address: The Nick Davey Laboratory, Human Performance Group, Division of  
24  
25 Surgery, Department of Surgery and Cancer, Faculty of Medicine, Imperial College London, W6 8RF.  
26

27  
28 Tel: +44 (0)20 331 38837; fax: +44 (0)20 331 38835. Email: [p.strutton@imperial.ac.uk](mailto:p.strutton@imperial.ac.uk)  
29  
30  
31  
32  
33  
34  
35  
36  
37  
38  
39  
40  
41  
42  
43  
44  
45  
46  
47  
48  
49  
50  
51  
52  
53  
54  
55  
56  
57  
58  
59  
60

1  
2  
3 **Abstract**  
4

5 **Objectives.** Characteristics of muscle activity, represented by surface electromyography (EMG), have  
6 revealed differences between patients with low back pain and healthy adults; how they relate to  
7 functional and clinical parameters remains unclear. The purpose of the current study was to examine  
8 the correlation between frequency characteristics of EMG (analysed using continuous wavelet  
9 transform (CWT) analysis) and patients' self-rated score of disability.  
10  
11

12 **Design and setting.** This is a case control study with fifteen patients with mechanical low back pain  
13 (LBP) without radicular symptoms. Patients were recruited from the orthopaedic clinic at Charing  
14 Cross Hospital. Ten healthy adults were recruited from the staff working in the hospital and  
15 associated university. Patients completed the Roland-Morris Disability Questionnaire (RMDQ) and  
16 bilateral EMG activity was obtained from erector spinae at vertebral levels L4 and T12. Subjects  
17 performed 3 brief maximal isometric voluntary contractions (MVCs) of the back extensors and the  
18 torque was measured using a dynamometer. CWT was applied to the EMG signals of each muscle in  
19 a 200ms window centred around the peak torque obtained during the MVCs. The ratio (low/high  
20 frequencies) of the energy, the peak power, and the frequency of the peak power were calculated  
21 for each recording site, averaged and correlated with the individual's RMDQ score.  
22  
23

24 **Results.** Patients had lower peak power (T12 and L4) and lower frequency of the peak power (at T12)  
25 than the healthy adults. Additionally, RMDQ positively correlated to the average ratio of energy at  
26 T12 ( $\rho=0.63$ ;  $p=0.012$ ), i.e. greater self-rated disability corresponded to a dominant distribution of  
27 energy in the lower frequencies.  
28  
29

30 **Conclusion.** The current findings reveal alterations in EMG profile and its association with self-  
31 related back pain disability, suggesting that spectral characteristics of EMG reflect muscle function.  
32  
33

34 **Keywords:** trunk muscles; isometric; electromyography; wavelet transform; back pain.  
35  
36  
37  
38  
39  
40  
41  
42  
43  
44  
45  
46  
47  
48  
49  
50  
51  
52  
53  
54  
55  
56  
57  
58  
59  
60

1  
2  
3 **1 Strengths and limitations of this study**  
4

- 5  
6 2 • This study uses a computational approach to decompose the signals of surface  
7  
8 3 electromyography obtained from paraspinal muscles in patients with low back pain with a view  
9  
10 4 to revealing information that may not be detected from a conventional amplitude analysis.  
11  
12 5 • The methodology of combining maximal voluntary isometric contraction of paraspinal muscles  
13  
14 6 and wavelet transform analysis offers the opportunity for a simple and quick assessment of  
15  
16 7 function of the back muscles.  
17  
18 8 • A difference in body mass between patients and controls indicates that careful interpretation of  
19  
20  
21 9 the findings are required.  
22  
23  
24  
25  
26  
27  
28  
29  
30  
31  
32  
33  
34  
35  
36  
37  
38  
39  
40  
41  
42  
43  
44  
45  
46  
47  
48  
49  
50  
51  
52  
53  
54  
55  
56  
57  
58  
59  
60

## Introduction

Low back pain (LBP) is a common health condition with 60-80% of people in the UK reporting it at some point in their lives<sup>1 2</sup>. The costs of back pain alone account for 20% of the total UK's health expenditure<sup>3</sup> and LBP is also an important cause of work absence. It has wide ranging impact upon both biological and psychosocial aspects such as physical impairments, mental health and loss of employment<sup>2 4</sup>. Evidence has shown that subjects with chronic low back pain (LBP) have changes in trunk muscle control by the central nervous system<sup>5 6</sup>, including reduced corticospinal excitability<sup>7</sup> and neural drive<sup>8</sup> in addition to anatomical changes such as in trunk muscle size and muscle fibre type which may account for observed altered activity patterns during functional tasks<sup>9 10</sup> and reductions in muscle strength and endurance<sup>11 12</sup>. Electromyographic (EMG) activity, including its temporal and spectral characteristics, has been commonly used to investigate muscle function. Changes in EMG signal amplitude are used as an indirect measure of overall muscle activity and of muscle contraction force<sup>13 14</sup>; however, the precise nature of the relationship between EMG amplitude and force output has not been established<sup>15 16</sup>. The frequency distribution of the EMG signals has been reported to be associated with the underlying muscle fibre type characteristics<sup>17 18</sup>. For example, fatigability of back muscles has shown to be related to the muscle fibre type area distribution in healthy subjects<sup>18</sup>. These observations indicate complex alterations in temporal (e.g. EMG signal amplitude) and spectral (e.g. median frequency) characteristics of muscle activity. Therefore, a simultaneous assessment of changes across these domains may provide more information on neuromuscular alterations of back muscles in patients with LBP.

Wavelet transform is a time-frequency method of signal analysis, which has been proposed to be more suitable for analysis of surface EMG since these are non-stationary<sup>19</sup> spikey<sup>20</sup> signals than short-time Fourier transform (STFT). Wavelet transform projects a signal into space comprised of functions limited in duration. This technique consists of mapping the signal in frequency and time from a series of base functions, which produces a family of ordered decompositions located in

1  
2  
3 different frequency bands. From a single basic wavelet, a so-called mother wavelet, stretching and  
4  
5 shifting (dilating and translating) the wavelet allows for discovery of the frequency content and  
6  
7 location in time of the signal <sup>21</sup>.

8  
9 Studies have shown associations between wavelet transform and muscle function. In healthy adults,  
10  
11 changes in EMG spectral power and frequency have been observed in limb and trunk muscles during  
12  
13 fatiguing exercise <sup>22 23</sup>. Previous work has demonstrated that energy distribution between low and  
14  
15 high frequency bands from leg muscles was different in individuals with diabetic neuropathy and in  
16  
17 postoperative total knee arthroplasty patients compared to controls <sup>24-26</sup>. This may be due to  
18  
19 changes in motor unit recruitment or muscle fibre type distribution in patients <sup>27 28</sup>. In patients with  
20  
21 LBP, the total power in the trunk muscles was lower and could be used to discriminate patients from  
22  
23 controls <sup>29</sup>. However, whether there are changes in energy distribution between low and high  
24  
25 frequency bands from trunk muscles and whether these changes correlate with any clinical or  
26  
27 functional scores (i.e. pain, disability) remains unclear.  
28  
29

30  
31 The purpose of the current study was to investigate whether time and frequency domain EMG  
32  
33 characteristics, obtained using continuous wavelet transform (CWT), of erector spinae muscles (ES)  
34  
35 in people with LBP are associated with levels of back pain disability and pain. We hypothesised that  
36  
37 the EMG characteristics would be different between people with LBP and controls and that the  
38  
39 energy distribution between low and high frequency bands would be associated with the level of  
40  
41 disability and/or pain.  
42

#### 43 **Materials and Methods**

##### 44 *Participants.*

45  
46  
47 With ethical approval (07/Q0410/5 - NHS NRES Committee London – Harrow) and written informed  
48  
49 consent, 15 patients with mechanical, non-specific low back pain (LBP group) were recruited from  
50  
51 the orthopaedic clinic at Charing Cross Hospital and 10 healthy controls were recruited from the  
52  
53 staff working in the hospital and associated university. Only subjects with mechanical LBP without  
54  
55  
56  
57  
58  
59  
60

1  
2  
3 radicular symptoms were included; those with back pain related to rheumatologic disease,  
4  
5 spondylolisthesis or spinal trauma or with constant severe pain were excluded. All of the subjects  
6  
7 were asked to complete the Edinburgh Handedness Inventory, a 10-item questionnaire with a score  
8  
9 between -100 (left handed) and 100 (right handed)<sup>30</sup> and a visual analogue pain scale (VAS; 0 - no  
10  
11 pain to 10 - maximum pain); patients additionally completed a 24-item Roland-Morris Disability  
12  
13 Questionnaire (RMDQ), a disease specific functional measure<sup>31</sup>; the scores range from 0, no  
14  
15 disability to 24, maximum disability.

16  
17  
18  
19 *Recordings.*

20  
21 **Torque.** Back extensor isometric torque was measured using a Cybex Norm Isokinetic Testing System  
22  
23 (CSMI Inc., Stoughton, MA, USA) with an extendable input lever arm. The output from the Cybex was  
24  
25 sampled at 500Hz by a data acquisition system [Power 1401 plus and Spike2 v5; Cambridge  
26  
27 Electronic Design (CED), Cambridge, UK] connected to a personal laptop for subsequent offline  
28  
29 analysis. **Electromyography (EMG).** Bilateral EMG recordings were obtained from the erector spinae  
30  
31 (ES) muscles at vertebral levels T12 and L4. Pairs of Ag/AgCl electrodes (self-adhesive, 2cm diameter,  
32  
33 CareFusion, UK) were positioned 3cm either side of the spinous processes, parallel to the fibre  
34  
35 orientation of ES muscles, with an inter-electrode distance of 2cm. A ground electrode was placed  
36  
37 over the left anterior superior iliac spine. The EMG signals were filtered (10Hz–1kHz), and amplified  
38  
39 (1000×; Iso-DAM, World Precision Instruments, UK) before being sampled at 4kHz by the data  
40  
41 acquisition system; both torque and EMG data were collected simultaneously.

42  
43  
44  
45  
46 *Experimental procedure.*

47  
48 The experimental setup has been used previously<sup>8 32</sup>. Briefly, subjects were positioned prone on the  
49  
50 dynamometer bench, with their ankles and hips strapped securely, to help isolate back muscle  
51  
52 movements as well as limit the contributions of hip extensors; the arms were by the sides and the  
53  
54 iliac crests were aligned with the pivot of the dynamometer lever arm. The lever arm was positioned  
55  
56 over the lower edge of the scapulae (see Fig. 1); this was confirmed by a physiotherapist (SYC) who  
57  
58  
59  
60

1  
2  
3 identified the inferior angle of the scapula for each subject by palpation. Subjects had a gentle  
4  
5 warm-up consisting of several push-ups into extension without using their arms. Following this,  
6  
7 three brief (~3s) maximal voluntary isometric contractions (MVICs) of the trunk extensors were  
8  
9 performed with at least 10 seconds interval between each contraction; consistent verbal  
10  
11 encouragement was given throughout. After each contraction, subjects were asked to indicate how  
12  
13 much effort they used on a modified Borg scale (from 0, no effort to 10, maximal effort)<sup>33</sup>.  
14  
15

#### 16 *Data analysis.*

17  
18  
19 The peak torque achieved during the 3 MVICs was identified and the EMG signals obtained during  
20  
21 the MIVC from each back muscle in a 200ms window centred on the peak torque were calculated as  
22  
23 root-mean-square amplitude (rmsEMG). They were then resolved into their respective intensities in  
24  
25 time-frequency space using a continuous wavelet transform (CWT), processed in MATLAB R2014a  
26  
27 (MathWorks, Natick, Massachusetts). Specifically, the Daubechies family of wavelet (in particular the  
28  
29 db4 wavelet) was selected for CWT decomposition due to the similarity between the wavelet and  
30  
31 the waveforms of motor unit action potentials<sup>34 35</sup>. Performing a CWT on a time waveform results in  
32  
33 a matrix of normalized coefficients calculated over scale and time. Scales were tested from 5 to 300  
34  
35 (corresponding to 595.29Hz-9.92Hz) with regards to the common signal bandwidth of surface EMG<sup>36</sup>  
36  
37<sup>37</sup>; the sum of the energy of the wavelet coefficient for the 200ms window was obtained for each  
38  
39 scale (Fig 1). The scales were then converted into their corresponding frequencies for further  
40  
41 analyses. Parameters including peak power and its corresponding frequency were obtained.  
42  
43 Furthermore, since the ratio of muscle fibre type I to type II in the ES has been reported to be  
44  
45 approximately 1.8<sup>38</sup>, the scale splitting the energy matrix into the ratio 1.8 of lower to higher energy  
46  
47 (low:high frequencies) for each muscle was identified from the controls. The scale was then used to  
48  
49 split the energy matrix obtained from the LBP group into two parts representing lower to higher  
50  
51 energy. The ratio of these two parts from the energy matrix was then calculated for each muscle for  
52  
53 individuals in the LBP group.  
54  
55  
56  
57  
58  
59  
60

### *Statistical analysis.*

Data were analysed using Statistical Program for the Social Sciences (SPSS) version 22 (IBM Corp, Armonk, NY). Demographic data and modified Borg scale scores were compared between the control group and the LBP group using independent-t tests and Chi-Square tests for scale data and for nominal data (gender), respectively. Normal distribution was tested by the Shapiro-Wilk test for spectral parameters and rmsEMG; since the variables of frequency at the peak power and the ratio were not normally distributed ( $p < 0.05$ ) and our sample sizes of two groups were not equal, non-parametric tests were applied. Wilcoxon Signed Rank tests and Mann-Whitney  $U$  tests were used to examine within-group and between-group differences, respectively. Within-group comparisons were made between left and right sides for rmsEMG at T12 and L4; between-group comparisons were made between rmsEMG, peak power and its corresponding frequency and the ratio of energy. Given that this ratio was based on the presumed ratio of muscle fibre type I to type II in the ES<sup>38</sup>, Spearman correlation coefficients were performed between the scores of questionnaires (RMDQ and VAS) and the ratio of energy in the LBP group. Statistical significance was set at  $p < 0.05$  and Bonferroni correction was applied to allow for multiple comparisons.

## **Results**

### *Group characteristics.*

Demographic data of the groups are shown in Table 1. The median (interquartile range) duration of back pain episode was 20 (22) months in patients with LBP. Of 15 patients with LBP, 6 had pain on the right side and 9 had bilateral pain. The MVIC torque (normalized to body mass) of patients was smaller than that of controls (mean $\pm$ SD: LBP: 2.88 $\pm$ 1.03 Nm/kg; C: 4.11 $\pm$ 1.42Nm/kg;  $Z = -2.16$ ;  $p = 0.03$ ). Further, the VAS reported by patients was 5.2 $\pm$ 2.84; as anticipated, controls reported no pain (i.e. 0.0). All subjects completed all aspects of the protocol; no data were excluded from analyses. During the MVICs, the modified Borg scale scores reported by the subjects were not different between the groups (LBP: 8.80 $\pm$ 1.04; C: 9.42 $\pm$ 0.60;  $p = 0.07$ ).



1  
2  
3 *Root-mean-square (RMS) EMG.*  
4

5  
6 There was no side difference in rms EMG in the LBP group (T12:  $Z=-1.36$ ;  $p=0.18$ ; L4:  $Z=-1.07$ ;  $p=0.29$ )  
7  
8 or in the controls (T12:  $Z=-0.30$ ;  $p=0.77$ ; L4:  $Z=-0.15$ ;  $p=0.88$ ; Table 2). The mean rmsEMG, averaged  
9  
10 from left and right ES, at T12 and L4 vertebral levels was significantly lower in the LBP group than in  
11  
12 the controls (T12:  $Z=-2.69$ ;  $p=0.007$ ; L4:  $Z=-2.33$ ;  $p=0.02$ ; Table 2).  
13

14  
15 *Spectral parameters.*  
16

17  
18 The peak power (Fig 2A) and its corresponding frequency (Fig 2B) of the transformed EMG were  
19  
20 different between the two groups. For the ES T12, the peak power and its corresponding frequency  
21  
22 were lower in the LBP group (peak power:  $0.84\pm 0.22$ ; frequency:  $40.94\pm 8.21\text{Hz}$ ) than in the controls  
23  
24 (peak power:  $1.17\pm 0.25$ ; frequency:  $49.56\pm 10.56\text{Hz}$ ; peak power:  $Z=-2.88$ ;  $p=0.004$ ; frequency:  $Z=-$   
25  
26  $2.16$ ;  $p=0.030$ ; Fig 2). For the ES L4, the peak power was lower in the LBP group (peak power:  
27  
28  $0.75\pm 0.18$ ) than in the controls (peak power:  $1.13\pm 0.29$ ;  $Z=-2.99$ ;  $p=0.003$ ; Fig 2A), whereas its  
29  
30 corresponding frequency (LBP group:  $40.64\pm 14.81\text{Hz}$ ; control group:  $47.97\pm 6.16\text{Hz}$ ) was not different  
31  
32 between two groups ( $Z=-1.66$ ;  $p=0.096$ ; Fig 2B).  
33

34  
35  
36 In the controls, the mean ( $\pm$ SD) scales splitting the energy matrix into the ratio to  $\sim 1.8$  of low to high  
37  
38 energy for T12 (the mean ratio was  $1.72\pm 0.05$ ) and L4 ( $1.74\pm 0.04$ ) were  $36.8\pm 10.52$  and  $34.25\pm 9.60$ ,  
39  
40 respectively; the corresponding frequencies were 87Hz for T12 and 96Hz for L4. The splitting scales  
41  
42 used in the LBP group were therefore 37 for T12 and 34 for L4; the mean ratios (low/high) at these  
43  
44 two scales were  $3.56\pm 2.36$  for T12 ( $Z=-2.11$ ;  $p=0.035$ , compared to the control group) and  $4.32\pm 3.19$   
45  
46 for L4 ( $Z=-1.94$ ;  $p=0.052$ ) scales in the LBP group. Spearman correlation analysis showed a  
47  
48 correlation between the ratios from ES T12 and the RMDQ scores ( $\rho=0.63$ ;  $p=0.012$ ; Fig 3);  
49  
50 however, the ratios from ES L4 did not significantly correlate with the RMDQ scores ( $\rho=0.47$ ;  
51  
52  $p=0.075$ ). The ratios did not correlate with the VAS scores (ES T12:  $\rho=0.09$ ;  $p=0.76$ . ES L4:  
53  
54  $\rho=0.01$ ;  $p=0.96$   $p>0.05$ ).  
55  
56  
57  
58  
59  
60

## Discussion

The current study used continuous wavelet transform to decompose the surface EMG signals recorded from the ES during maximal isometric back extensions performed by patients with LBP and controls. In patients with LBP, there was a lower peak power in ES T12 and L4 and the overall energy distribution in ES T12 was shifted toward lower frequencies than in the controls. Moreover, the ratios of energy between low and high frequencies, calculated from ES T12, correlated with patients' self-rated back pain disability which may highlight the potential clinical application of wavelet analysis in monitoring the progression of, or response to treatment, for back pain.

Frequency analysis has been widely applied to analyse EMG signals recorded from paraspinal muscles in patients with chronic LBP and short-time Fourier transform (STFT) has been used in the majority of studies. Mean and median frequencies were lower in patients with chronic LBP than in controls<sup>29 39</sup>; however, controversial results are still reported<sup>40 41</sup>. Although there is evidence that analysis of back muscle EMG activity using STFT and wavelet transform provides similar information<sup>23 42 43</sup>, some studies suggest that wavelet transform could detect changes in muscle fatigue earlier and be more sensitive than the STFT<sup>44-46</sup>. A recent study used discrete wavelet transform on surface EMG of trunk muscles during the contraction in subjects with chronic LBP and in controls. Patients with chronic LBP had lower spectral power in the trunk muscles compared to the healthy subjects<sup>29</sup>; however, their study did not include any subjective measurements (e.g. pain scores, disability scores) or compare energy distribution between low and high frequency bands, which may reflect alterations in motor unit recruitment or muscle fibre type distributions. Our results show patients with LBP presented different EMG characteristics from healthy subjects, including lower peak power (both ES T12 and L4) and its corresponding frequency (ES T12), and higher ratio of energy between low and high frequencies (ES T12), in line with previous findings that patients with chronic LBP have an overall shift of energy distribution toward lower frequencies in the back muscles<sup>47</sup>. We further demonstrate a correlation between the energy distribution calculated from the EST12 and the

1  
2  
3 RMDQ, indicating an association between muscle function and self-rated disability. However, the  
4  
5 reduced volume muscle at the lumbar level <sup>38</sup> might explain the differences in the findings between  
6  
7 ES T12 and L4 levels. Together with previous work showing that EMG variables recorded from ES  
8  
9 may identify people at increased risk of developing low back pain in two years <sup>48</sup>, we suggest that  
10  
11 the EMG characteristics could be useful in clinics to monitor progression of back pain as well as the  
12  
13 effectiveness of therapeutic interventions.  
14

15  
16 Changes in spectral energy from leg and thigh muscles have been found in individuals with diabetic  
17  
18 neuropathy and are suggested to be related to alterations in muscle recruitment strategies due to  
19  
20 the loss of type I fibres in this population <sup>25</sup>. Studies have shown that instantaneous spectra derived  
21  
22 from wavelet decomposition of EMG signals are associated with activity from different muscle fibre  
23  
24 types using a range of approaches including electrical nerve stimulation <sup>28</sup> and voluntary  
25  
26 contractions <sup>49</sup>. In addition, previous findings using conventional Fourier transformation  
27  
28 demonstrated a correlation between the change in median frequency in ES during fatiguing exercise  
29  
30 and the relative area of the muscle occupied by type I fibres in healthy subjects <sup>18</sup>. Anatomical  
31  
32 evidence from biopsy studies is equivocal, with some studies demonstrating differences in muscle  
33  
34 fibre-type proportions in paraspinal muscles between patients with LBP and healthy subjects <sup>50 51</sup>,  
35  
36 whilst others show no differences <sup>52 53</sup>. Nevertheless, studies using twitch interpolation to assess  
37  
38 central neural drive to muscles suggest that decreases in time-to-peak amplitude of superimposed  
39  
40 twitches at increasing levels of voluntary contraction reflect the recruitment of different types of  
41  
42 motor units <sup>32 54-56</sup>. Further, given patients with chronic LBP have been shown to exhibit longer time-  
43  
44 to-peak amplitudes of twitches during MVICs, this supports the view that these patients have  
45  
46 alterations in muscle fibre-type composition. In the current study, the spectra obtained from the  
47  
48 patients with LBP had a shift in the peak power towards the lower frequencies; this might reflect  
49  
50 alterations in motor control or in muscle fibre-type proportions. Further, the correlation between  
51  
52 the EMG spectral characteristics and back pain-related disability scores suggests that altered motor  
53  
54 control or fibre-type proportions of paraspinal muscles may be reflected in self-rated disability  
55  
56  
57  
58  
59  
60

1  
2  
3 scores. This highlights the importance of rehabilitation to restore motor control and muscle function  
4  
5 in patients with LBP, which may reduce the levels of disability reported in these patients.  
6  
7

8 The approach used in the current study may provide a valuable tool for clinical assessment. Surface  
9  
10 EMG recordings are easy to use in clinics and the task is feasible for people with chronic LBP as all of  
11  
12 our patients were able to perform the 3 maximal isometric back extensions. While factors such as  
13  
14 fear avoidance or pain inhibition likely affect the values of maximal muscle activity, our subjects  
15  
16 were given adequate warm-up time as well as asked to repeat the contractions 3 times, with the  
17  
18 highest value taken. They were also asked to report pain levels during the MVICs and to give an  
19  
20 indication (on a modified Borg scale) of the degree of effort used to perform the MVICs. Patients  
21  
22 reported no increase in pain, and levels of effort comparable to the controls. Wavelet transform is a  
23  
24 robust approach for the surface EMG signal and could reveal extra features which may be useful to  
25  
26 monitor subtle changes in muscle function during rehabilitation. A further study to test whether the  
27  
28 wavelet approach is able to detect the therapeutic effect on muscle function is therefore warranted.  
29  
30

31  
32 In conclusion, the patients with LBP recruited in the current study had lower maximal force of the  
33  
34 back extensors and smaller ES muscle activity during the MVICs. The wavelet transform further  
35  
36 revealed alterations in EMG profile and its association with the self-related back pain disability,  
37  
38 indicating that spectral characteristics of EMG reflect muscle function.  
39  
40

#### 41 **Acknowledgments**

42  
43  
44 We would like to thank all participants of this study.  
45  
46  
47  
48  
49

50 **Funding statement:** There was no funding or other form of support for this project.  
51  
52

53 **Competing interests:** None declared.  
54  
55

56 **Author's contributions:** SYC and PHS conceived and designed the study. SYC and PHS conducted the  
57  
58 experiment. SYC, EK and PHS analysed the data and interpreted the data. PG provided guidance on  
59  
60

1  
2  
3 the data analysis. All authors drafted the manuscript and read, edited and approved the final version  
4  
5 of the manuscript. All authors had full access to all of the data in the study and can take  
6  
7 responsibility for the integrity of the data and the accuracy of the data analysis.  
8  
9

10 **Data sharing statement:** No additional data are available.  
11  
12

## 13 14 15 **References**

- 16  
17  
18 1. Macfarlane GJ, Thomas E, Croft PR, et al. Predictors of early improvement in low back pain  
19 amongst consulters to general practice: the influence of pre-morbid and episode-related  
20 factors. *Pain* 1999;80(1-2):113-9.
- 21  
22 2. Dunn KM, Croft PR. Epidemiology and natural history of low back pain. *Eura Medicophys*  
23 2004;40(1):9-13.
- 24  
25 3. Maniadakis N, Gray A. The economic burden of back pain in the UK. *Pain* 2000;84(1):95-103.
- 26  
27 4. Chou R, Qaseem A, Snow V, et al. Diagnosis and treatment of low back pain: a joint clinical  
28 practice guideline from the American College of Physicians and the American Pain Society.  
29 *Ann Intern Med* 2007;147(7):478-91.
- 30  
31 5. Hodges PW, Moseley GL, Gabrielsson A, et al. Experimental muscle pain changes feedforward  
32 postural responses of the trunk muscles. *Exp Brain Res* 2003;151(2):262-71. doi:  
33 10.1007/s00221-003-1457-x
- 34  
35 6. Strutton PH, Theodorou S, Catley M, et al. Corticospinal excitability in patients with chronic low  
36 back pain. *J Spinal Disord Tech* 2005;18(5):420-4.
- 37  
38 7. Tsao H, Danneels LA, Hodges PW. Smudging the motor brain in young adults with recurrent low  
39 back pain. *Spine (Phila Pa 1976)* 2011;36(21):1721-7. doi: 10.1097/BRS.0b013e31821c4267  
40 [published Online First: 2011/04/22]
- 41  
42 8. Chiou SY, Shih YF, Chou LW, et al. Impaired neural drive in patients with low back pain. *European*  
43 *journal of pain* 2014;18(6):794-802.
- 44  
45 9. Dubois JD, Piche M, Cantin V, et al. Effect of experimental low back pain on neuromuscular control  
46 of the trunk in healthy volunteers and patients with chronic low back pain. *Journal of*  
47 *electromyography and kinesiology : official journal of the International Society of*  
48 *Electrophysiological Kinesiology* 2011;21(5):774-81. doi: 10.1016/j.jelekin.2011.05.004
- 49  
50 10. D'Hooge R, Hodges P, Tsao H, et al. Altered trunk muscle coordination during rapid trunk flexion  
51 in people in remission of recurrent low back pain. *Journal of electromyography and*  
52 *kinesiology : official journal of the International Society of Electrophysiological Kinesiology*  
53 2013;23(1):173-81. doi: 10.1016/j.jelekin.2012.09.003
- 54  
55 11. Nicolaisen T, Jorgensen K. Trunk strength, back muscle endurance and low-back trouble. *Scand J*  
56 *Rehabil Med* 1985;17(3):121-7.
- 57  
58 12. Roy SH, De Luca CJ, Casavant DA. Lumbar muscle fatigue and chronic lower back pain. *Spine*  
59 *(Phila Pa 1976)* 1989;14(9):992-1001.
- 60  
61 13. Pitcher MJ, Behm DG, MacKinnon SN. Reliability of electromyographic and force measures during  
62 prone isometric back extension in subjects with and without low back pain. *Applied*  
63 *physiology, nutrition, and metabolism = Physiologie appliquee, nutrition et metabolisme*  
64 2008;33(1):52-60. doi: 10.1139/H07-132
- 65  
66 14. Hubley-Kozey CL, Vezina MJ. Differentiating temporal electromyographic waveforms between  
67 those with chronic low back pain and healthy controls. *Clin Biomech (Bristol, Avon)*  
68 2002;17(9-10):621-9.

15. Huebner A, Faenger B, Scholle HC, et al. Re-evaluation of the amplitude-force relationship of trunk muscles. *Journal of biomechanics* 2015;48(6):1198-205. doi: 10.1016/j.jbiomech.2015.02.016
16. Kumar S, Narayan Y. Torque and EMG in isometric graded flexion-rotation and extension-rotation. *Ergonomics* 2001;44(8):795-813. doi: 10.1080/00140130110045802
17. Gerdle B, Karlsson S, Crenshaw AG, et al. The influences of muscle fibre proportions and areas upon EMG during maximal dynamic knee extensions. *European journal of applied physiology* 2000;81(1-2):2-10. doi: 10.1007/PL00013792
18. Mannion AF, Dumas GA, Stevenson JM, et al. The influence of muscle fiber size and type distribution on electromyographic measures of back muscle fatigability. *Spine (Phila Pa 1976)* 1998;23(5):576-84.
19. Karlsson S, Yu J, Akay M. Time-frequency analysis of myoelectric signals during dynamic contractions: a comparative study. *IEEE Trans Biomed Eng* 2000;47(2):228-38. doi: 10.1109/10.821766
20. Karlsson S, Yu J, Akay M. Enhancement of spectral analysis of myoelectric signals during static contractions using wavelet methods. *IEEE Trans Biomed Eng* 1999;46(6):670-84.
21. von Tscherner V. Intensity analysis in time-frequency space of surface myoelectric signals by wavelets of specified resolution. *Journal of electromyography and kinesiology : official journal of the International Society of Electrophysiological Kinesiology* 2000;10(6):433-45.
22. Chowdhury SK, Nimbarte AD, Jaridi M, et al. Discrete wavelet transform analysis of surface electromyography for the fatigue assessment of neck and shoulder muscles. *Journal of electromyography and kinesiology : official journal of the International Society of Electrophysiological Kinesiology* 2013;23(5):995-1003. doi: 10.1016/j.jelekin.2013.05.001
23. Coorevits P, Danneels L, Cambier D, et al. Test-retest reliability of wavelet - and Fourier based EMG (instantaneous) median frequencies in the evaluation of back and hip muscle fatigue during isometric back extensions. *Journal of electromyography and kinesiology : official journal of the International Society of Electrophysiological Kinesiology* 2008;18(5):798-806. doi: 10.1016/j.jelekin.2007.01.007
24. Weiderpass HA, Pachi CG, Yamamoto JF, et al. Time-frequency analysis methods for detecting effects of diabetic neuropathy. *Int J Numer Method Biomed Eng* 2013;29(9):1000-10. doi: 10.1002/cnm.2545
25. Sacco IC, Hamamoto AN, Onodera AN, et al. Motor strategy patterns study of diabetic neuropathic individuals while walking. A wavelet approach. *Journal of biomechanics* 2014;47(10):2475-82. doi: 10.1016/j.jbiomech.2014.04.007
26. Kuntze G, von Tscherner V, Hutchison C, et al. Alterations in lower limb multimuscle activation patterns during stair climbing in female total knee arthroplasty patients. *J Neurophysiol* 2015;114(5):2718-25. doi: 10.1152/jn.00370.2015
27. Solomonow M, Baten C, Smit J, et al. Electromyogram power spectra frequencies associated with motor unit recruitment strategies. *J Appl Physiol (1985)* 1990;68(3):1177-85.
28. Wakeling JM, Syme DA. Wave properties of action potentials from fast and slow motor units of rats. *Muscle & nerve* 2002;26(5):659-68. doi: 10.1002/mus.10263
29. Kumar S, Prasad N. Torso muscle EMG profile differences between patients of back pain and control. *Clin Biomech (Bristol, Avon)* 2010;25(2):103-9. doi: 10.1016/j.clinbiomech.2009.10.013
30. Oldfield RC. The assessment and analysis of handedness: the Edinburgh inventory. *Neuropsychologia* 1971;9(1):97-113.
31. Roland M, Fairbank J. The Roland-Morris Disability Questionnaire and the Oswestry Disability Questionnaire. *Spine (Phila Pa 1976)* 2000;25(24):3115-24.
32. Chiou SY, Jeevathol A, Odedra A, et al. Voluntary activation of trunk extensors appears normal in young adults who have recovered from low back pain. *Eur J Pain* 2015;19(10):1506-15. doi: 10.1002/ejp.684

- 1  
2  
3 33. Borg GA. Psychophysical bases of perceived exertion. *Medicine and science in sports and exercise*  
4 1982;14(5):377-81.
- 5 34. Beck TW, Housh TJ, Johnson GO, et al. Comparison of the fast Fourier transform and continuous  
6 wavelet transform for examining mechanomyographic frequency versus eccentric torque  
7 relationships. *J Neurosci Methods* 2006;150(1):59-66. doi: 10.1016/j.jneumeth.2005.06.003
- 8 35. Croce R, Miller J, Chamberlin K, et al. Wavelet analysis of quadriceps power spectra and  
9 amplitude under varying levels of contraction intensity and velocity. *Muscle & nerve*  
10 2014;50(5):844-53. doi: 10.1002/mus.24230
- 11 36. van Boxtel A. Optimal signal bandwidth for the recording of surface EMG activity of facial, jaw,  
12 oral, and neck muscles. *Psychophysiology* 2001;38(1):22-34.
- 13 37. Rosenburg R, Seidel H. Electromyography of lumbar erector spinae muscles--influence of  
14 posture, interelectrode distance, strength, and fatigue. *Eur J Appl Physiol Occup Physiol*  
15 1989;59(1-2):104-14.
- 16 38. Mannion AF, Dumas GA, Cooper RG, et al. Muscle fibre size and type distribution in thoracic and  
17 lumbar regions of erector spinae in healthy subjects without low back pain: normal values  
18 and sex differences. *J Anat* 1997;190 ( Pt 4):505-13.
- 19 39. Linsinski P. Surface EMG in chronic low back pain. *European spine journal : official publication of*  
20 *the European Spine Society, the European Spinal Deformity Society, and the European Section*  
21 *of the Cervical Spine Research Society* 2000;9(6):559-62.
- 22 40. Kramer M, Ebert V, Kinzl L, et al. Surface electromyography of the paravertebral muscles in  
23 patients with chronic low back pain. *Archives of physical medicine and rehabilitation*  
24 2005;86(1):31-6.
- 25 41. Humphrey AR, Nargol AV, Jones AP, et al. The value of electromyography of the lumbar  
26 paraspinal muscles in discriminating between chronic-low-back-pain sufferers and normal  
27 subjects. *European spine journal : official publication of the European Spine Society, the*  
28 *European Spinal Deformity Society, and the European Section of the Cervical Spine Research*  
29 *Society* 2005;14(2):175-84. doi: 10.1007/s00586-004-0792-3
- 30 42. da Silva RA, Lariviere C, Arsenault AB, et al. The comparison of wavelet- and Fourier-based  
31 electromyographic indices of back muscle fatigue during dynamic contractions: validity and  
32 reliability results. *Electromyography and clinical neurophysiology* 2008;48(3-4):147-62.
- 33 43. Coorevits P, Danneels L, Cambier D, et al. Correlations between short-time Fourier- and  
34 continuous wavelet transforms in the analysis of localized back and hip muscle fatigue  
35 during isometric contractions. *Journal of electromyography and kinesiology : official journal*  
36 *of the International Society of Electrophysiological Kinesiology* 2008;18(4):637-44. doi:  
37 10.1016/j.jelekin.2007.01.006
- 38 44. Chowdhury SK, Nimbarte AD. Comparison of Fourier and wavelet analysis for fatigue assessment  
39 during repetitive dynamic exertion. *Journal of electromyography and kinesiology : official*  
40 *journal of the International Society of Electrophysiological Kinesiology* 2015;25(2):205-13.  
41 doi: 10.1016/j.jelekin.2014.11.005
- 42 45. Pope MH, Aleksiev A, Panagiotacopoulos ND, et al. Evaluation of low back muscle surface EMG  
43 signals using wavelets. *Clin Biomech (Bristol, Avon)* 2000;15(8):567-73.
- 44 46. Penailillo L, Silvestre R, Nosaka K. Changes in surface EMG assessed by discrete wavelet  
45 transform during maximal isometric voluntary contractions following supramaximal cycling.  
46 *Eur J Appl Physiol* 2013;113(4):895-904. doi: 10.1007/s00421-012-2499-1
- 47 47. Sparto PJ, Parnianpour M, Barria EA, et al. Wavelet analysis of electromyography for back muscle  
48 fatigue detection during isokinetic constant-torque exertions. *Spine (Phila Pa 1976)*  
49 1999;24(17):1791-8.
- 50 48. Heydari A, Nargol AV, Jones AP, et al. EMG analysis of lumbar paraspinal muscles as a predictor  
51 of the risk of low-back pain. *European spine journal : official publication of the European*  
52 *Spine Society, the European Spinal Deformity Society, and the European Section of the*  
53 *Cervical Spine Research Society* 2010;19(7):1145-52. doi: 10.1007/s00586-010-1277-1
- 54  
55  
56  
57  
58  
59  
60

- 1  
2  
3 49. Wakeling JM, Rozitis AI. Spectral properties of myoelectric signals from different motor units in  
4 the leg extensor muscles. *J Exp Biol* 2004;207(Pt 14):2519-28. doi: 10.1242/jeb.01042  
5  
6 50. Bajek S, Bobinac D, Bajek G, et al. Muscle fiber type distribution in multifidus muscle in cases of  
7 lumbar disc herniation. *Acta medica Okayama* 2000;54(6):235-41.  
8  
9 51. Mannion AF, Weber BR, Dvorak J, et al. Fibre type characteristics of the lumbar paraspinal  
10 muscles in normal healthy subjects and in patients with low back pain. *Journal of*  
11 *orthopaedic research : official publication of the Orthopaedic Research Society*  
12 1997;15(6):881-87. doi: 10.1002/jor.1100150614  
13  
14 52. Mattila M, Hurme M, Alaranta H, et al. The multifidus muscle in patients with lumbar disc  
15 herniation. A histochemical and morphometric analysis of intraoperative biopsies. *Spine*  
16 *(Phila Pa 1976)* 1986;11(7):732-8.  
17  
18 53. Crossman K, Mahon M, Watson PJ, et al. Chronic low back pain-associated paraspinal muscle  
19 dysfunction is not the result of a constitutionally determined "adverse" fiber-type  
20 composition. *Spine (Phila Pa 1976)* 2004;29(6):628-34.  
21  
22 54. Milner-Brown HS, Stein RB, Yemm R. The orderly recruitment of human motor units during  
23 voluntary isometric contractions. *J Physiol* 1973;230(2):359-70.  
24  
25 55. Henneman E, Somjen G, Carpenter DO. Excitability and inhibitability of motoneurons of different  
26 sizes. *J Neurophysiol* 1965;28(3):599-620.  
27  
28 56. Bottle E, Strutton PH. Relationship between back muscle endurance and voluntary activation.  
29 *Journal of electromyography and kinesiology : official journal of the International Society of*  
30 *Electrophysiological Kinesiology* 2012;22(3):383-90. doi: 10.1016/j.jelekin.2012.02.006;  
31 10.1016/j.jelekin.2012.02.006  
32  
33  
34  
35  
36  
37  
38  
39  
40  
41  
42  
43  
44  
45  
46  
47  
48  
49  
50  
51  
52  
53  
54  
55  
56  
57  
58  
59  
60



1  
2  
3 **1 Figure Captions**  
4

5  
6 **2 Figure 1.** Experimental setup (top left) and peak torque and EMG activity recorded from left and  
7  
8 right erector spinae at T12 (L ES and R ES) from a representative subject during one maximal  
9  
10 voluntary isometric contraction (MVIC, top right). A representative 3 dimensional matrix of power,  
11  
12 scale (frequency) and time calculated from a continuous wavelet transform analysis of the EMG data  
13  
14 centred around the peak torque (bottom right). The bottom left figure represents the sum of the  
15  
16 power collapsed across the time-window. The area under the curve has been split according to the  
17  
18 ratio 1.8 (see data analysis) and the corresponding scale was used to split the curve derived from  
19  
20 each patient dataset.  
21  
22

23  
24 **10 Figure 2.** Group mean ( $\pm$ SEM) data showing (A) peak power and (B) its corresponding frequency  
25  
26 from erector spinae muscles at vertebral levels T12 (ES T12) and L4 (ES L4) in the controls and in  
27  
28 patients with LBP. \* $p < 0.05$ , between-group comparison.  
29  
30

31  
32 **13 Figure 3.** Correlation between the ratio of energy at low to high (low:high) frequencies and Roland-  
33  
34 Morris Disability Questionnaire (RMDQ) in subjects with LBP.  
35  
36  
37  
38  
39  
40  
41  
42  
43  
44  
45  
46  
47  
48  
49  
50  
51  
52  
53  
54  
55  
56  
57  
58  
59  
60

Table 1. Demographic data.

| Characteristics                               | Controls (n = 10) | LBP (n = 15)   | P value |
|-----------------------------------------------|-------------------|----------------|---------|
| Age (years)                                   | 44.6 ± 7.9        | 43.5 ± 6.3     | 0.72    |
| Gender                                        | 5Male; 5Female    | 6Male; 9Female | 0.70    |
| Body stature (m)                              | 1.70 ± 0.09       | 1.70 ± 0.07    | 0.95    |
| Body mass (kg)                                | 72.37 ± 10.32     | 87.67 ± 24.39  | 0.04    |
| Edinburgh Handedness Inventory                | 64.44 ± 54.34     | 79.00 ± 33.21  | 0.51    |
| Roland-Morris Disability Questionnaire (0-24) | 0.0 ± 0.0         | 10.27 ± 6.45   | < 0.001 |
| VAS (0-10)                                    | 0.0 ± 0.0         | 5.20±2.84      | < 0.001 |

Data are presented as mean ± standard deviation. LBP: low back pain; VAS: visual analogue pain scale. For the Edinburgh Handedness Inventory, -100 indicates left handed whereas 100 indicates right handed; for the VAS, 0 means no pain at all and 10 means maximum pain imaginable; for the Roland-Morris Disability Questionnaire, the scores range from 0, no disability to 24, maximum disability.

Table 2. Root-mean-square EMG (mV) during maximal isometric back extension.

|         | ES T12    |           |            | ES L4     |           |            |
|---------|-----------|-----------|------------|-----------|-----------|------------|
|         | Left      | Right     | Average    | Left      | Right     | Average    |
| Control | 0.21±0.08 | 0.20±0.07 | 0.21±0.07  | 0.22±0.10 | 0.22±0.10 | 0.22±0.09  |
| LBP     | 0.13±0.07 | 0.12±0.08 | 0.12±0.07* | 0.12±0.12 | 0.14±0.07 | 0.13±0.12* |

Data are presented as mean ± standard deviation. LBP: low back pain. \*p<0.05 between the LBP group and the control group.

1  
2  
3  
4  
5  
6  
7  
8  
9  
10  
11  
12  
13  
14  
15  
16  
17  
18  
19  
20  
21  
22  
23  
24  
25  
26  
27  
28  
29  
30  
31  
32  
33  
34  
35  
36  
37  
38  
39  
40  
41  
42  
43  
44  
45  
46  
47  
48  
49

Figure 1



Figure 1. Experimental setup (top left) and peak torque and EMG activity recorded from left and right erector spinae at T12 (L ES and R ES) from a representative subject during one maximal voluntary isometric contraction (MVIC, top right). A representative 3 dimensional matrix of power, scale (frequency) and time calculated from a continuous wavelet transform analysis of the EMG data centred around the peak torque (bottom right). The bottom left figure represents the sum of the power collapsed across the time-window. The area under the curve has been split according to the ratio 1.8 (see data analysis) and the corresponding scale was used to split the curve derived from each patient dataset.

190x107mm (300 x 300 DPI)

Figure 2



Figure 2. Group mean ( $\pm$ SEM) data showing (A) peak power and (B) its corresponding frequency from erector spinae muscles at vertebral levels T12 (ES T12) and L4 (ES L4) in the controls and in patients with LBP. \* $p < 0.05$ , between-group comparison.

147x81mm (300 x 300 DPI)

Figure 3

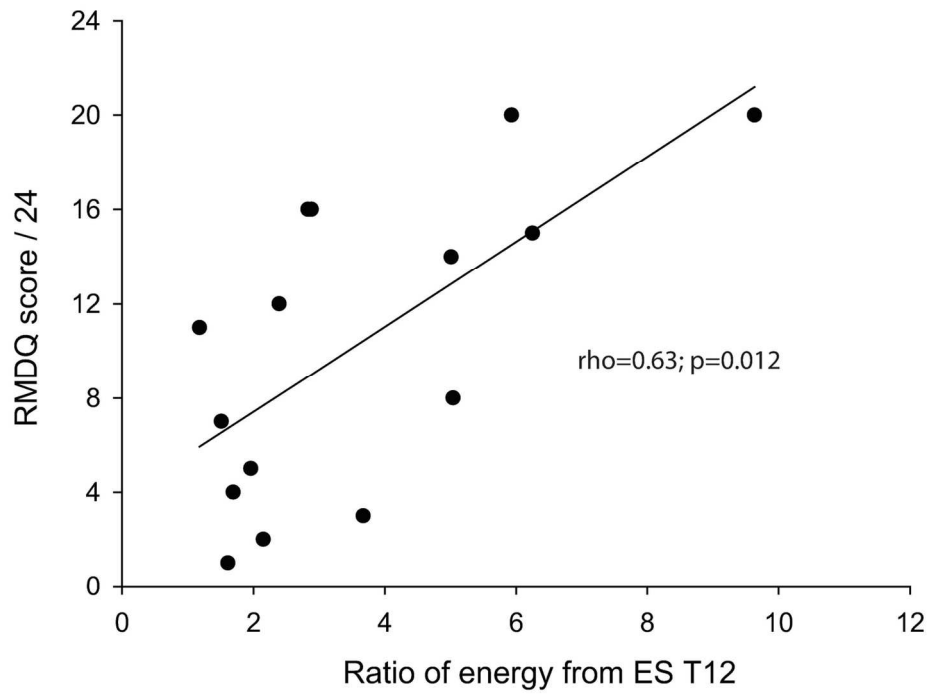

Figure 3. Correlation between the ratio of energy at low to high (low:high) frequencies and Roland-Morris Disability Questionnaire (RMDQ) in subjects with LBP.

135x115mm (300 x 300 DPI)

only
